# Supplementary material for: Self-reported hearing loss in Russians: the population-based Ural Eye and Medical Study
Source: PubMed Central journal article supplement — BMJ Open. 2019 Mar 20;9(3):e024644. doi: 10.1136/bmjopen-2018-024644 (PMC6475155; doi:10.1136/bmjopen-2018-024644), 2019-03-20
Supplement: bmjopen-2018-024644.draft_revisions.pdf [file bmjopen-2018-024644.draft_revisions.pdf]

# BMJ Open

BMJ Open is committed to open peer review. As part of this commitment we make the peer review history of every article we publish publicly available.

When an article is published we post the peer reviewers' comments and the authors' responses online. We also post the versions of the paper that were used during peer review. These are the versions that the peer review comments apply to.

The versions of the paper that follow are the versions that were submitted during the peer review process. They are not the versions of record or the final published versions. They should not be cited or distributed as the published version of this manuscript.

BMJ Open is an open access journal and the full, final, typeset and author-corrected version of record of the manuscript is available on our site with no access controls, subscription charges or pay-per-view fees (<http://bmjopen.bmj.com>).

If you have any questions on BMJ Open's open peer review process please email [info.bmjopen@bmj.com](mailto:info.bmjopen@bmj.com)

# BMJ Open

## Self-Reported Hearing Loss in Russians. The Ural Eye and Medical Study

|                               |                                                                                                                                                                                                                                                                                                                                                                                                                                                                                                                                                                                                                                                                                                                                                                                                                                                                                                                                                                                                                                                                                                                                                                                                                                                                                                                                                                                                                                             |
|-------------------------------|---------------------------------------------------------------------------------------------------------------------------------------------------------------------------------------------------------------------------------------------------------------------------------------------------------------------------------------------------------------------------------------------------------------------------------------------------------------------------------------------------------------------------------------------------------------------------------------------------------------------------------------------------------------------------------------------------------------------------------------------------------------------------------------------------------------------------------------------------------------------------------------------------------------------------------------------------------------------------------------------------------------------------------------------------------------------------------------------------------------------------------------------------------------------------------------------------------------------------------------------------------------------------------------------------------------------------------------------------------------------------------------------------------------------------------------------|
| Journal:                      | <i>BMJ Open</i>                                                                                                                                                                                                                                                                                                                                                                                                                                                                                                                                                                                                                                                                                                                                                                                                                                                                                                                                                                                                                                                                                                                                                                                                                                                                                                                                                                                                                             |
| Manuscript ID                 | bmjopen-2018-024644                                                                                                                                                                                                                                                                                                                                                                                                                                                                                                                                                                                                                                                                                                                                                                                                                                                                                                                                                                                                                                                                                                                                                                                                                                                                                                                                                                                                                         |
| Article Type:                 | Research                                                                                                                                                                                                                                                                                                                                                                                                                                                                                                                                                                                                                                                                                                                                                                                                                                                                                                                                                                                                                                                                                                                                                                                                                                                                                                                                                                                                                                    |
| Date Submitted by the Author: | 11-Jun-2018                                                                                                                                                                                                                                                                                                                                                                                                                                                                                                                                                                                                                                                                                                                                                                                                                                                                                                                                                                                                                                                                                                                                                                                                                                                                                                                                                                                                                                 |
| Complete List of Authors:     | <p>Bikbov, Mukharram; Ufa Eye Research Institute, Ufa, Bashkortostan, Russia</p> <p>Fayzrakhmanov , Rinat; Ufa Eye Research Institute, Ufa, Bashkortostan, Russia</p> <p>Kazakbaeva, Gyulli; Ufa Eye Research Institute, Ufa, Bashkortostan, Russia</p> <p>Zainullin, Rinat; Ufa Eye Research Institute, Ufa, Bashkortostan, Russia</p> <p>Salavatova, Venera; Ufa Eye Research Institute, Ufa, Bashkortostan, Russia</p> <p>Gilmanshin, Timur; Ufa Eye Research Institute, Ufa, Bashkortostan, Russia</p> <p>Arslangareeva, INga; Ufa Eye Research Institute, Ufa, Bashkortostan, Russia</p> <p>Nikitin, Nikolai; Ufa Eye Research Institute, Ufa, Bashkortostan, Russia</p> <p>Panda-Jonas, Songhomitra; Augenpraxis Jonas, Seegartenklinik, Heidelberg</p> <p>Mukhamadieva, Svetlana; Ufa Eye Research Institute, Ufa, Bashkortostan, Russia</p> <p>Yakupova, Dilya; Ufa Eye Research Institute, Ufa, Bashkortostan, Russia</p> <p>Khikmatullin, Renat; Ufa Eye Research Institute, Ufa, Bashkortostan, Russia</p> <p>Aminev, Said ; Ufa Eye Research Institute, Ufa, Bashkortostan, Russia</p> <p>Nuriev, Ildar ; Ufa Eye Research Institute, Ufa, Bashkortostan, Russia</p> <p>Zaynetdinov , Artur; Ufa Eye Research Institute, Ufa, Bashkortostan, Russia</p> <p>Uzianbaeva, Yulia ; Ufa Eye Research Institute, Ufa, Bashkortostan, Russia</p> <p>Jonas, Jost; Department of Ophthalmology; Ruprecht-Karls-University Heidelberg</p> |
| Keywords:                     | EPIDEMIOLOGY, OTOLARYNGOLOGY, Adult otolaryngology < OTOLARYNGOLOGY                                                                                                                                                                                                                                                                                                                                                                                                                                                                                                                                                                                                                                                                                                                                                                                                                                                                                                                                                                                                                                                                                                                                                                                                                                                                                                                                                                         |
|                               |                                                                                                                                                                                                                                                                                                                                                                                                                                                                                                                                                                                                                                                                                                                                                                                                                                                                                                                                                                                                                                                                                                                                                                                                                                                                                                                                                                                                                                             |

SCHOLARONE™  
Manuscripts

## Self-Reported Hearing Loss in Russians. The Ural Eye and Medical Study

Mukharram M. Bikbov MD PhD(1), Rinat R. Fayzrakhmanov, MD PhD(1), Gyulli M. Kazakbaeva, MD(1), Rinat M. Zainullin, MD(1), Venera F. Salavatova, MD(1), Timur R. Gilmanshin, MD(1), Inga I. Arslangareeva, MD(1), Nikolai A. Nikitin, MD(1), Songhomitra Panda-Jonas, MD (2), Svetlana R. Mukhamadieva, MD(1), Dilya F. Yakupova, MD(1), Renat I. Khikmatullin, MD(1), Said K. Aminev, MD(1), Ildar F. Nuriev, MD(1), Artur F. Zaynetdinov MD(1), Yulia V. Uzianbaeva, MD(1), Jost B. Jonas MD(3)

(1) Ufa Eye Research Institute, Ufa, Bashkortostan, Russia

(2) Augenpraxis Jonas, Seegartenklinik, Heidelberg

(3) Department of Ophthalmology, Medical Faculty Mannheim of the Ruprecht-Karls-University of Heidelberg, Germany

Running title: Hearing loss in Russians

Key words: Hearing loss; Presbyakusis; Audiometry; Depression; Population-based study; Ural Eye and Medical Study;

Funding: None

Financial disclosures: None

Corresponding author: Prof. Mukharram Bikbov, Ufa Eye Research Institute, 90 Pushkin Street, Ufa 450077, Bashkortostan, Russia; Tel.: +7(347)272-37-75; email: Bikbov.m@gmail.com; Prof. Jost Jonas, Department of Ophthalmology, Medical Faculty Mannheim, Theodor-Kutzerufer 1, 68167 Mannheim, Germany; Tel.: +49-6221-3929320; email: Jost.Jonas@medma.uni-heidelberg.de.

Author Contribution: Design and conception: M.M. Bikbov, Fayzrakhmanov RR, G.M. Kazakbaeva, J.B. Jonas; Data assessment: Bikbov MM, Fayzrakhmanov RR, Kazakbaeva GM, Zainullin RM, Arslangareeva II, Gilmanshin TR, Salavatova VF, Nikitin NA, Mukhamadieva SR, Yakupova DF, Khikmatullin RI, Zaynetdinov AF, Uzianbaeva YV, Aminev SK, Nuriev IF, Jonas JB; Statistical analysis: J.B. Jonas, S. Panda-Jonas; Writing of the manuscript: J.B. Jonas, S. Panda-Jonas; Editing and final approval of the manuscript: Bikbov MM, Fayzrakhmanov RR, Kazakbaeva GM, Zainullin RM, Salavatova VF, Gilmanshin TR, Arslangareeva II, Nikitin NA, S. Panda-Jonas, Mukhamadieva SR, Yakupova DF, Khikmatullin RI, Aminev SK, Nuriev IF, Zaynetdinov AF, Uzianbaeva YV, Jonas JB

- Data sharing statement: No additional data available

**Abstract**

**Objectives:** With information about frequency of hearing loss in Russia and Eastern Europe mostly missing, we assessed the prevalence of hearing loss in a Russian population.

**Setting:** The population-based study Ural Eye and Medical Study was conducted in a rural region of Bashkortostan and in the city of Ufa/Bashkortostan/Russia.

**Participants:** With an inclusion criterion of 40+ years, the study included 5899 (80.5%) out of 7328 eligible individuals (mean age:59.0±10.7 years; range:40-94 years).

**Primary and secondary outcome measures:** Hearing loss examined in 5397 (91.5%) study participants, as it was assessed in a standardized interview with questions on self-reported hearing difficulties.

**Results:** The prevalence of hearing loss (26.1%;95% confidence interval (CI):24.2,27.2) increased from 10.9% (95%CI:8.0,13.7) in the 40-45 year-olds to 59.0% (95%CI:51.6,66.4) in the 80+ year-olds. It was higher for men than for women in the age group of 60-80 years (38.93%;95%CI:35.8,42.1 vs. 32.8%;95%CI:30.2,35.3; $P=0.003$ ). In multivariable analysis, higher prevalence of hearing loss was associated with older age ( $P<0.001$ ;odds ratio (OR):1.06;95%CI:1.06,1.07), male gender ( $P<0.001$ ;OR:1.26;95%CI:1.09,1.47), higher depression score ( $P<0.001$ ;OR:1.06;95%CI:1.04,1.08), and higher prevalence of headache ( $P=0.001$ ;OR:1.27;95%CI:1.10,1.47), history of cardiovascular disease including stroke ( $P=0.001$ ;OR:1.32;95%CI:1.13,1.55), osteoarthritis ( $P<0.001$ ;OR:1.40;95%CI:1.18,1.67), physically vigorous activity during work ( $P<0.001$ ;OR:1.40;95%CI:1.21,1.62), alcohol consumption ( $P<0.001$ ;OR:1.51;95%CI:1.28,1.78) and dry eye feeling ( $P<0.001$ ;OR:1.67;95%CI:1.30,2.16). It was marginally correlated with a higher anxiety score ( $P=0.07$ ;OR:1.03;95%CI:0.998,1.06). It was independent of diabetes ( $P=0.52$ ), arterial hypertension ( $P=0.20$ ), level of education ( $P=0.11$ ;OR:0.97;95%CI:0.93,1.01), region of habitation ( $P=0.70$ ), blood concentration of high-density lipoproteins ( $P=0.17$ ) and low-density lipoproteins ( $P=0.52$ ), current smoking ( $P=0.95$ ) and smoking package years ( $P=0.37$ ), and best corrected visual acuity ( $P=0.93$ ).

**Conclusions:** As in other countries the prevalence of hearing loss is high in this elderly population in Russia. It is primarily or secondarily associated with older age, depression, male gender, cardiovascular disease and alcohol consumption.

**Article Summary**

Strengths and limitations of this study:

- The prevalence of hearing loss as a major parameter of the global burden of disease and the correlations of hearing loss with some other parameters have been examined so far mostly in Western countries.
- The study adds information about the prevalence and associated factors of hearing loss in Russia where so far almost no information about the epidemiology of hearing loss was available.
- The study adds information about the associations of hearing loss with a multitude of systemic parameters assessed in a multivariate analysis.

1  
2  
3  
4  
5  
6  
7  
8  
9  
10  
11  
12  
13  
14  
15  
16  
17  
18  
19  
20  
21  
22  
23  
24  
25  
26  
27  
28  
29  
30  
31  
32  
33  
34  
35  
36  
37  
38  
39  
40  
41  
42  
43  
44  
45  
46  
47  
48  
49  
50  
51  
52  
53  
54  
55  
56  
57  
58  
59  
60

83 - Limitation of our study were that hearing loss was assessed in a series of 11 standardized questions  
84 without performing an audiometric examination,  
85

For peer review only

## 86 Introduction

87 Deficits of sensory organ function form a major part of the causes for disability associated life years  
88 (DALYs) as assessed by the Global Burden of Disease Study (GBD).<sup>1</sup> In the GBD 2016, sense organ  
89 diseases caused 66.7 million DALYS (95% uncertainty interval (UI): 46.5 million to 92.3 million) or  
90 2.8% of all DALYs in 2016, up from 39.4 million DALYS (95%UI: 27.3 million to 54.5 million) in 1995  
91 and 54.8 million DALYs (95%CI: 38.2 million to 76.0 million) in 2006.<sup>1</sup> Sense organ diseases-  
92 associated DALYs increased in the ranking of the most common causes of DALYs from position #16  
93 in 1995 to rank #14 in 2006 and to rank #7 in 2016.<sup>1</sup> Age-related and other hearing loss accounted for  
94 29.7 million DALYS (95%UI: 25.3 million to 50.9 million) or 44.5% of all sense organs-associated  
95 DALYs in 2016. The age-standardized DALY rate per 100,000 individuals for hearing loss was 524.3  
96 (95%UI: 368.0 to 734.0) in 2016 and accounted for 54.7% of the age-standardized DALY rate for all  
97 sense organs-associated DALYs (959.3; 95%UI: 670.2 to 1331.0).<sup>1</sup>

98 Despite its importance for public health, the prevalence of hearing loss and its associated  
99 factors have not widely been investigated worldwide.<sup>2-11</sup> For many countries, information on the  
100 prevalence of hearing loss has not been available yet, nor on the factors associated with hearing loss.  
101 It holds true in particular for Russia and Eastern Europe. We therefore conducted this study to assess  
102 the prevalence of hearing loss in a population in a Russian population and explored associations of  
103 hearing loss with other parameters such as gender, region of habitation and level of education. The  
104 aim was to investigate the prevalence of self-reported hearing problems, that is, hearing difficulties in  
105 general and difficulties in following a conversation in noise.

## 108 Methods

109 The Ural Eye and Medical Study (UEMS) is a population-based study which was carried out in the  
110 urban region of Kirovskii of the city of Ufa and in villages of the rural region of the Karmaskalinsky  
111 District in a distance of 65 km from Ufa.<sup>12,13</sup> According to the Declaration of Helsinki, the Ethics  
112 Committee of the Academic Council of the Ufa Eye Research Institute approved the study and all  
113 participants gave informed written consent. The ethics committee confirmed that all methods were  
114 performed in accordance with the relevant guidelines and regulations. Inclusion criterion for the  
115 participation in the study was living in the study region and having an age of 40+ years. There were  
116 no exclusion criteria.

117 Trained social workers performed a standardized interview including more than 250 questions  
118 on socioeconomic parameters such as level of education, family income and family possessions, living  
119 conditions, diet, smoking or other types of tobacco consumption, daily physical activity, alcohol  
120 consumption, depression and suicidal ideas, and medical history including known diagnosis and  
121 therapy of major diseases. The interview consisted of standardized questions which had been  
122 validated in previous studies such as the mini-mental state examination or Folstein test or in Zung's  
123 self-rated depression scale.<sup>14,15</sup> We collected and reported the data using the Guidelines for Accurate  
124 and Transparent Health Estimates Reporting (GATHER statement guidelines).<sup>16</sup>

125 For all study participants, we measured the arterial blood pressure and pulse rate and the  
126 anthropomorphic parameters of body height, body weight and circumference of the hip and waist. The

1  
2  
3 127 handgrip strength was determined using a dynamometer (dynamometer - dk 140, ZAO Nizhnetagilskiy  
4 128 Medical Instrument Plant, Nizhniy Tagil, Russia). Blood samples taken under fasting conditions were  
5 129 biochemically examined. All participants underwent a pulmonary function test by spirometry (Riester  
6 130 spirotest, Riester Company, Jungingen, Germany). We defined arterial hypertension by a systolic  
7 131 blood pressure  $\geq 140$  mmHg and/or a diastolic blood pressure  $\geq 90$  mmHg, and/or self-reported history  
8 132 or current treatment of arterial hypertension with antihypertensive medication. A glucose  
9 133 concentration  $\geq 7.0$  mmol/L or a self-reported history of physician diagnosis of diabetes mellitus or a  
10 134 history of drug treatment for diabetes (insulin or oral hypoglycemic agents) characterized the presence  
11 135 of diabetes mellitus. Depression was assessed applying the Center for Epidemiologic Studies  
12 136 Depression Scale (CES-D) Scoresheet. The study design has been described in detail recently.<sup>12</sup>

13 137 Hearing loss was assessed by a series of 11 standardized questions (Table 1). The questions  
14 138 could be answered by “no” (0 points), “sometimes” (2 points) and “yes (4 points). The total hearing  
15 139 loss score was the sum of all points and could range between 0 points and 44 points. The amount of  
16 140 hearing loss was assessed by the hearing loss score. As a binary variable, hearing loss was  
17 141 additionally defined as a definite answer of “Yes” (in contrast to the answer of “Sometimes” or “No”) to  
18 142 the question “Do you experience a hearing loss?”

19 143 We used a commercially available statistical software program (Statistical Package for Social  
20 144 Science, SPSS, version 25.0; IBM-SPSS Inc., Chicago, USA) for statistical analysis. In a first step, we  
21 145 determined the frequency of hearing loss, presenting the results as mean and 95% confidence  
22 146 intervals (CI). In a second step, we searched for associations in univariate analysis between the  
23 147 hearing loss score and other parameters. In a third step, we conducted a multivariable regression  
24 148 analysis with the hearing loss score as dependent variable and as independent variables all those  
25 149 parameters which were significantly associated with the hearing loss score in the univariate analysis.  
26 150 All variables in the list of independent parameters were tested for multicollinearity. Associations of the  
27 151 prevalence of hearing loss as binary variable were examined in binary regression analysis. Odds  
28 152 ratios (OR) and their 95% confidence intervals (CI) were calculated. All *P*-values were two-sided and  
29 153 considered statistically significant when the values were less than 0.05.

30 154

31 155 Patient and Public Involvement

32 156 Patients were not involved in the study.

33 157

## 34 158 **Results**

35 159 The study included 5899 individuals (2580 (43.7%) men) out of a population of 7328 eligible  
36 160 individuals, who resided in the study regions and who fulfilled the inclusion criterion of an age of 40+  
37 161 years. The participation rate as ratio of 5899 / 7328 was 80.5%. Out of the 5889 individuals primarily  
38 162 participating in the Ural Eye and Medical Study, the present study included 5397 (91.5%) individuals  
39 163 with available information on the hearing loss score. The mean age of the study population (2450  
40 164 (45.4%) men) was  $58.6 \pm 10.6$  years (median: 58 years; range: 40 – 94 years). The composition of  
41 165 the study population with respect to gender and age corresponded to the gender and age distribution  
42 166 in the Russian population according to the most recent census carried out in 2010.<sup>17</sup> The mean body  
43 167 height was  $165.0 \pm 8.8$  cm (median: 164 cm; range: 112 – 196 cm), and the mean body mass index

1  
2  
3 168 was  $27.9 \pm 5.0 \text{ kg/m}^2$  (median:  $27.3 \text{ kg/m}^2$ ; range:  $13.96 - 60.96 \text{ kg/m}^2$ ). Illiteracy was present for 14  
4 169 (0.3%) individuals, 86 (1.6%) participants had passed the fifth grade, 557 (10.3%) participants the 8th  
5 170 grade, 628 (11.6%) participants the 10th grade, and 638 (11.8) individuals the 11th grade. Graduates  
6 171 were 1785 (33.1%) individuals, and post graduates were 51 (0.9%) study participants, and 1634  
7  
8 172 individuals had a specialized secondary education. .

9  
10 173 The group of individuals with information on hearing loss as compared with the group of  
11 174 subjects without hearing loss data was significantly younger ( $58.6 \pm 10.6$  years versus  $63.0 \pm 11.3$   
12 175 years;  $P < 0.001$ ), and had significantly more men (2450 (45.4%) men / 2947 (54.6%) women) versus  
13 176 130 (25.9%) men / 372 (74.1%) women);  $P < 0.001$ ). The mean hearing loss score was  $5.13 \pm 10.95$   
14 177 (median: 0; range: 0 – 44). Within the ethnically Russian group ( $n = 1185$ ; 508 men, 677 women) with a  
15 178 mean age of  $60.1 \pm 11.1$  years, the mean hearing loss score was  $5.58 \pm 11.09$  (median: 0; range: 0 –  
16 179 44), with no significant ( $P = 0.11$ ) difference to the non-Russian group. An abnormal result of Weber's  
17 180 test was found for 210 (3.9%; 95%CI: 3.4, 4.4) study participants and an abnormal result for Rinné test  
18 181 for 3390 (63.0%; 95%CI: 61.7, 64.3) individuals. The hearing loss score differed significantly between  
19 182 individuals with a positive Weber's test and individuals with a negative Weber's test ( $23.9 \pm 14.7$  vs.  
20 183  $4.4 \pm 10.1$ ;  $P < 0.001$ ).

21 184 In univariate analysis, the hearing loss score was correlated with parameters such as older  
22 185 age ( $P < 0.001$ ) (Table 2) (Fig. 1), male gender ( $P < 0.001$ ) (Fig. 1) and other parameters  
23 186 (Supplementary Table 1). The multivariable regression analysis included the hearing loss score as  
24 187 dependent variable and as independent variables all those parameters which were significantly  
25 188 associated with the hearing loss score in the univariate analysis. Due to collinearity, we first dropped  
26 189 body weight (variance inflation factor (VIF): 6.8) and waist circumference (VIF: 4.0). We then dropped  
27 190 step by step those parameters which were no longer statistically significantly associated with hearing  
28 191 loss in the multivariate analysis. In the resulting final model, a higher hearing loss score was  
29 192 associated (regression coefficient  $r$ : 0.33) with older age ( $P < 0.001$ ), male gender ( $P < 0.001$ ), a higher  
30 193 depression score ( $P < 0.001$ ), a higher prevalence of headache ( $P < 0.001$ ) and a higher prevalence of  
31 194 history of cancer ( $P = 0.008$ ), cardiovascular disease including stroke ( $P = 0.003$ ), osteoarthritis  
32 195 ( $P = 0.006$ ) and skin disease ( $P = 0.01$ ), a lower number of days with intake of fruits ( $P = 0.02$ ), and a  
33 196 higher amount of physically vigorous activity during work ( $P = 0.008$ ) and of physically moderate activity  
34 197 during leisure time ( $P < 0.001$ ) (Table 3).

35 198 Hearing loss defined as binary variable by a definite answer of "Yes" to the question "Do you  
36 199 experience a hearing loss?" was prevalent in 1406 (26.1%; 95%CI: 24.2, 27.2) participants. It was  
37 200 significantly associated with a positive Weber's test (OR: 24.0; 95%CI: 15.7, 36.7). The prevalence of  
38 201 hearing loss increased with older age ( $P < 0.001$ ; OR: 1.06; 95%CI: 1.05, 1.07) (Table 4). In the age  
39 202 group between 60 and <80 years, prevalence of hearing loss was significantly ( $P = 0.003$ ) higher for  
40 203 men than for women (38.93% (95%CI: 35.8, 42.1) vs. 32.8% (95%CI: 30.2, 35.3). For the age group  
41 204 of less than 60 years ( $P = 0.57$ ) and for the age group of 80+ years ( $P = 0.87$ ), both gender did not differ  
42 205 significantly in the prevalence of hearing loss (Fig. 2). In the total study population, the prevalence of  
43 206 hearing loss increased from 10.9% (95%CI: 8.0, 13.7) in the age group of 40 to <45 years, to 22.7%  
44 207 (95%CI: 20.0, 25.4) in the age group of 55 to <60 years, and to 59.0% (95%CI: 51.6, 66.4) in the age  
45 208 group of 80+ years (Fig. 2).



209 In multivariable binary regression analysis, higher prevalence of hearing loss was associated  
210 with older age ( $P<0.001$ ), male gender ( $P<0.001$ ), a higher depression score ( $P<0.001$ ), a higher  
211 prevalence of headache ( $P=0.001$ ) and a higher prevalence of history of cancer ( $P=0.04$ ),  
212 cardiovascular disease including stroke ( $P=0.001$ ) and osteoarthritis ( $P<0.001$ ), a higher amount of  
213 physically vigorous activity during work ( $P<0.001$ ), higher prevalence of alcohol consumption  
214 ( $P<0.001$ ) and of dry eye feeling ( $P<0.001$ ) (Table 5). Prevalence of hearing loss was marginally  
215 correlated with a higher anxiety score, when added to the model ( $P=0.07$ ; OR: 1.03; 95%CI: 0.998,  
216 1.06). If diabetes ( $P=0.52$ ), arterial hypertension ( $P=0.20$ ), level of education ( $P=0.11$ ; OR: 0.97;  
217 95%CI: 0.93, 1.01), urban versus rural region of habitation ( $P=0.70$ ), blood concentration of high-  
218 density lipoproteins ( $P=0.17$ ) and low-density lipoproteins ( $P=0.52$ ), current smoking ( $P=0.95$ ) and  
219 smoking package years ( $P=0.37$ ), and best corrected visual acuity ( $P=0.93$ ) and presenting visual  
220 acuity ( $P=0.62$ ) and anxiety score ( $P=0.07$ ; OR: 1.03; 95%CI: 0.998, 1.06) were added to the model,  
221 these variables were not significantly associated with hearing loss.

## 224 Discussion

225 In this Russian population, hearing loss, increasing in its prevalence from 10.9% (95%CI:8.0,13.7) in  
226 the 40 to 45 year-olds to 59.0% (95%CI:51.6,66.4) in the 80+ years-olds, was associated with older  
227 age, male gender, a higher depression score and a higher prevalence of headache, history of  
228 cardiovascular disease including stroke, osteoarthritis, physically vigorous activity during work, alcohol  
229 consumption and dry eye feeling. It was marginally significantly correlated with a higher anxiety score  
230 ( $P=0.07$ ).

231 The findings obtained in our study on a population in Russia can be compared with  
232 observations made in previous investigations conducted in other world regions. The high overall  
233 prevalence of hearing loss of 26.1% (95%CI: 24.2, 27.2) in our study population aged 40+ years  
234 agreed well with the data of the World Health Organization WHO that over 5% of the world's  
235 population – or 466 million people – has disabling hearing loss (432 million adults and 34 million  
236 children).<sup>18</sup> The prevalence of hearing loss as found in our study population also compared well with  
237 figures reported by Ikeda and colleagues and by the Health, Aging and Body Composition Study after  
238 adjusting for age differences in the study populations.<sup>19,20</sup> It was lower than the figures found by  
239 Hannula and associates (prevalence of self-reported hearing problems of 37.1% and of 43.3% for  
240 difficulties in following a conversation in noise),<sup>21</sup> and it was lower than the prevalence of unilateral  
241 and bilateral speech-frequency hearing impairment in the National Health and Nutrition Examination  
242 Survey.<sup>22-24</sup>

243 In all studies as in our investigation, the prevalence of hearing loss strongly increased with  
244 older age for both gender (Fig. 1, 2).<sup>26-42</sup> In our study population, the age-related increase in the  
245 prevalence of hearing loss was less marked for women than for men in the age group of 60 to <80  
246 years (Fig. 1, 2). As in the previous studies on other ethnicities, the frequency of hearing loss was  
247 higher for men than for women.<sup>24-42</sup> In our study, the gender difference hold true for the age group of  
248 60 to <80 years (38.93%;95%CI:35.8,42.1 vs. 32.8%;95%CI:30.2,35.3; $P=0.003$ ). In the age group  
249 between 60 and <80 years, prevalence of hearing loss was significantly ( $P=0.003$ ) higher for men than

250 for women (38.93% (95%CI: 35.8, 42.1) vs. 32.8% (95%CI: 30.2, 35.3). For the age group of less  
251 than 60 years ( $P=0.57$ ) and for the age group of 80+ years ( $P=0.87$ ), both gender did not differ  
252 significantly in the prevalence of hearing loss.

253 In our study, a higher prevalence of hearing loss was associated with a higher prevalence of  
254 vigorous physical activity during work. It was in contrast to the finding reported by Gispén and  
255 coworkers who used data of the National Health and Nutritional Examination Survey (2005-06) and  
256 found that individuals with moderate or greater hearing impairment had greater odds than those with  
257 normal hearing of being in a lower category of physical activity.<sup>34</sup> The association between vigorous  
258 physical activity at work and higher prevalence of hearing loss in our study might have been due to a  
259 potentially confounding correlation between heavy work and higher noise level at work.

260 In the National Health and Nutrition Examination Survey and in a study by Sommer et al.  
261 hearing impairment was more prevalent among adults with diabetes in a multivariable analysis.<sup>8</sup> It is  
262 in contrast to our study in which neither diabetes nor blood concentrations of glucose were  
263 significantly correlated with hearing loss (Supplementary Table 1). As a corollary, hearing loss in our  
264 study was not significantly correlated with the body mass index (Supplementary Table 1). It is in  
265 partial contrast to the results of the study by Lalwani and colleagues who found that in children of 12 to  
266 19 years of age, obese adolescents as compared adolescents with normal body weight had elevated  
267 pure tone hearing thresholds and greater prevalence of unilateral low-frequency sensorineural hearing  
268 loss ( $P=0.01$ ).<sup>32</sup>

269 A higher prevalence of self-reported hearing impairment was associated with a higher  
270 depression score in our study as well as in the study by Li and colleagues who used data of the  
271 National Health and Nutrition Examination Survey (NHANES), 2005-2010, and who found that that  
272 self-reported hearing impairment and audiometrically determined hearing loss were significantly  
273 associated with depression, particularly in women.<sup>33</sup>

274 The association between hearing loss and cardiovascular risk factors has remained unclear so  
275 far. While in our study population and in a study by Lohi et al. cardiovascular risk factors were not  
276 significantly associated with hearing loss, the National Health and Nutrition Examination Survey and  
277 the Health, Aging and Body Composition Study reported that cardiovascular risk generated by  
278 smoking and diabetes was associated with both high- and low-frequency hearing loss.<sup>21,24,26,30,36</sup>  
279 Reasons for the discrepancy between the studies may be differences in the study population (lifestyle  
280 in Russia versus lifestyle in the US or in Korea), differences in the multivariable analysis and others.

281 Limitations of our study should be discussed. First, the main outcome parameter was self-  
282 reported hearing loss assessed in a series of 11 standardized questions. In previous studies,  
283 audiometry was applied to quantify the hearing impairment. Although the latter method is a more  
284 quantitative one, the degree of self-reported hearing impairment as compared to audiometrically  
285 defined hearing loss may be more important to reflect the quality of the daily life of the individual.  
286 Interestingly, a study by Hannula et al. showed that self-reported hearing difficulties were more  
287 frequent than hearing impairment defined by audiometric measurement.<sup>20</sup> Hannula also reported that  
288 self-reported hearing difficulties predicted hearing impairment at high frequencies (4-8 kHz) rather  
289 than at the frequencies of 0.5-4 kHz, which were commonly used to define the degree of hearing  
290 impairment in medical and legal issues. Second, as for any population-based study the participation

1  
2  
3 291 rate and the representativeness of the study population as compared to the population of the region or  
4 292 country the study is aiming at is critical. In our study, 80.5% of the eligible population participated in  
5 293 the survey so that a major bias in the inclusion of study participants appears unlikely. The multi-ethnic  
6 294 composition of our study population was typical for the region and showed as compared to North-  
7 295 Western Russia and Central Russia a lower percentage of Russians on the total population. To  
8 296 overcome this limitation, we assessed the frequency of hearing loss in dependence of the ethnic  
9 297 background and found that the prevalence of hearing impairment did not differ significantly between  
10 298 the Russian groups than in the non-Russian group.

11  
12  
13 299 In conclusion, in our typically ethnically mixed, urban and rural Russian population aged 40+  
14 300 years, the mean prevalence of hearing loss was 26.1% and increased from 10.9% in the 40 to 45  
15 301 year-olds to 59.0% in the 80+ years-olds. In addition to older age, it was associated with male gender,  
16 302 depression and a higher prevalence of headache, history of cardiovascular disease including stroke,  
17 303 physically vigorous activity during work, alcohol consumption and dry eye feeling, and marginally  
18 304 significantly correlated with a higher anxiety score. These data may be useful to elucidate the  
19 305 epidemiology of hearing loss in Russia and to assess factors associated with hearing impairment.  
20  
21  
22  
23 306

307 **References**

- 308 1. GBD 2016 DALYs and HALE Collaborators. Global, regional, and national disability-adjusted life-  
309 years (DALYs) for 333 diseases and injuries and healthy life expectancy (HALE) for 195 countries and  
310 territories, 1990-2016: a systematic analysis for the Global Burden of Disease Study 2016. *Lancet*.  
311 2017;390:1260-1344.
- 312 2. Cruickshanks KJ, Dhar S, Dinces E, Fifer RC, Gonzalez F, II, Heiss G, et al. Cigarette smoking and  
313 hearing loss: the epidemiology of hearing loss study. *JAMA*. 1998;279:1715-1719.
- 314 3. Vilayur E, Gopinath B, Harris DC, Burlutsky G, McMahon CM, Mitchell P. The association between  
315 reduced GFR and hearing loss: a cross-sectional population-based study. *Am J Kidney Dis*.  
316 2010;56:661-669.
- 317 4. Béria JU, Raymann BC, Gigante LP, Figueiredo AC, Jotz G, Roithman R, et al. Hearing impairment  
318 and socioeconomic factors: a population-based survey of an urban locality in southern Brazil. *Rev*  
319 *Panam Salud Publica*. 2007;21:381-387.
- 320 5. Klein BE, Cruickshanks KJ, Nondahl DM, Klein R, Dalton DS. Cataract and hearing loss in a  
321 population-based study: the Beaver Dam studies. *Am J Ophthalmol*. 2001;132:537-543.
- 322 6. Raynor LA, Pankow JS, Miller MB, Huang GH, Dalton D, Klein R, et al. Familial aggregation of age-  
323 related hearing loss in an epidemiological study of older adults. *Am J Audiol*. 2009;18:114-118.
- 324 7. Gurgel RK, Ward PD, Schwartz S, Norton MC, Foster NL, Tschanz JT. Relationship of hearing loss  
325 and dementia: a prospective, population-based study. *Otol Neurotol*. 2014;35:775-781.
- 326 8. Su P, Hsu CC, Lin HC, Huang WS, Yang TL, Hsu WT, et al. Age-related hearing loss and dementia:  
327 a 10-year national population-based study. *Eur Arch Otorhinolaryngol*. 2017;274:2327-2334.
- 328 9. Sommer J, Brenann-Jones CG, Eikelboom RH, Hunter M, Davis WA, Atlas MD, et al. A population-  
329 based study of the association between dysglycaemia and hearing loss in middle age. *Diabet Med*.  
330 2017;34:683-690.
- 331 10. Asghari A, Farhadi M, Daneshi A, Khabazkhoob M, Mohazzab-Torabi S, Jalessi M, et al. The  
332 prevalence of hearing impairment by age and gender in a population-based study. *Iran J Public*  
333 *Health*. 2017; 46:1237-1246.
- 334 11. Smith AK, Ritchie CS, Miao Y, Boscardin WJ, Wallhagen ML. Self-reported hearing in the last 2  
335 years of life in older adults. *J Am Geriatr Soc*. 2016;64:1486-1491.
- 336 12. Bikbov M, Fayzrakhmanov RR, Kazakbaeva G, Jonas JB. Ural Eye and Medical Study: description  
337 of study design and methodology. *Ophthalmic Epidemiol*. 2018;25:187-198.
- 338 13. Wikipedia. Bashkortostan. <https://en.wikipedia.org/wiki/Bashkortostan>; assessed 4.3.2018
- 339 14. Folstein MF, Folstein SE, McHugh PR "Mini-mental state". A practical method for grading the  
340 cognitive state of patients for the clinician. *J Psychiatr Res*. 12, 189-198 (1975).
- 341 15. Zung WW A Self-rating depression scale. *Arch Gen Psychiatry*. 12, 63-70 (1965).
- 342 16. Stevens GA, Alkema L, Black RE, Boerma JT, Collins GS, Ezzati M, et al. Guidelines for Accurate  
343 and Transparent Health Estimates Reporting: the GATHER statement. *Lancet*. 2016;388: e19-23.
- 344 17. [https://en.wikipedia.org/wiki/Demographics\\_of\\_Russia](https://en.wikipedia.org/wiki/Demographics_of_Russia). Assessed 5.11.2017
- 345 18. WHO. Deafness and hearing loss. Fact sheet. Updated March 2018.  
346 <http://www.who.int/mediacentre/factsheets/fs300/en/>; assessed 18.3.2018,

- 1  
2  
3 347 19. Ikeda N, Murray CJ, Salomon JA. Tracking population health based on self-reported impairments:  
4 348 Trends in the prevalence of hearing loss in US adults, 1976-2006. *Am J Epidemiol*. 2009;170:80-87.  
5 349 20. Helzner EP, Cauley JA, Pratt SR, Wisniewski SR, Zmuda JM, Talbott EO, et al. Race and sex  
6 350 differences in age-related hearing loss: the Health, Aging and Body Composition Study. *J Am Geriatr*  
7 351 *Soc*. 2005;53:2119-2127.  
8 352 21. Hannula S, Bloigu R, Majamaa K, Sorri M, Mäki-Torkko E. Self-reported hearing problems among  
9 353 older adults: prevalence and comparison to measured hearing impairment. *J Am Acad Audiol*.  
10 354 2011;22:550-559.  
11 355 22. Hoffman HJ, Dobie RA, Losonczy KG, Themann CL, Flamme GA. Declining prevalence of hearing  
12 356 loss in US adults aged 20 to 69 years. *JAMA Otolaryngol Head Neck Surg*. 2017;143:274-285.  
13 357 23. Ciletti L, Flamme GA. Prevalence of hearing impairment by gender and audiometric configuration:  
14 358 results from the National Health and Nutrition Examination Survey (1999-2004) and the Keokuk  
15 359 County Rural Health Study (1994-1998). *J Am Acad Audiol*. 2008;19:672-685.  
16 360 24. Agrawal Y, Platz EA, Niparko JK. Prevalence of hearing loss and differences by demographic  
17 361 characteristics among US adults: data from the National Health and Nutrition Examination Survey,  
18 362 1999-2004. *Arch Intern Med*. 2008;168:1522-1530.  
19 363 25. Cruickshanks KJ, Dhar S, Dinces E, Fifer RC, Gonzalez F 2nd, Heiss G, et al. Hearing impairment  
20 364 prevalence and associated risk factors in the Hispanic Community Health Study/Study of Latinos.  
21 365 *JAMA Otolaryngol Head Neck Surg*. 2015;141:641-648.  
22 366 26. Agrawal Y, Platz EA, Niparko JK. Risk factors for hearing loss in US adults: data from the National  
23 367 Health and Nutrition Examination Survey, 1999 to 2002. *Otol Neurotol*. 2009;30:139-145.  
24 368 27. Shargorodsky J, Curhan SG, Curhan GC, Eavey R. Change in prevalence of hearing loss in US  
25 369 adolescents. *JAMA*. 2010;304:772-778.  
26 370 28. Lin FR, Thorpe R, Gordon-Salant S, Ferrucci L. Hearing loss prevalence and risk factors among  
27 371 older adults in the United States. *J Gerontol A Biol Sci Med Sci*. 2011;66:582-590.  
28 372 29. Lin FR, Niparko JK, Ferrucci L. Hearing loss prevalence in the United States. *Arch Intern Med*.  
29 373 2011;171:1851-1852.  
30 374 30. Bainbridge KE, Hoffman HJ, Cowie CC. Risk factors for hearing impairment among U.S. adults  
31 375 with diabetes: National Health and Nutrition Examination Survey 1999-2004. *Diabetes Care*.  
32 376 2011;34:1540-1545.  
33 377 31. Lin FR, Maas P, Chien W, Carey JP, Ferrucci L, Thorpe R. Association of skin color,  
34 378 race/ethnicity, and hearing loss among adults in the USA. *J Assoc Res Otolaryngol*. 2012;13:109-117.  
35 379 32. Lalwani AK, Katz K, Liu YH, Kim S, Weitzman M. Obesity is associated with sensorineural hearing  
36 380 loss in adolescents. *Laryngoscope*. 2013;123:3178-3184.  
37 381 33. Li CM, Zhang X, Hoffman HJ, Cotch MF, Themann CL, Wilson MR. Hearing impairment  
38 382 associated with depression in US adults, National Health and Nutrition Examination Survey 2005-  
39 383 2010. *JAMA Otolaryngol Head Neck Surg*. 2014;140:293-302.  
40 384 34. Gispen FE, Chen DS, Genther DJ, Lin FR. Association between hearing impairment and lower  
41 385 levels of physical activity in older adults. *J Am Geriatr Soc*. 2014;62:1427-1433.  
42 386 35. Jun HJ, Hwang SY, Lee SH, Lee JE, Song JJ, Chae S. The prevalence of hearing loss in South  
43 387 Korea: data from a population-based study. *Laryngoscope*. 2015;125:690-694.

- 1  
2  
3 388 36. Lohi V, Hannula S, Ohtonen P, Sorri M, Mäki-Torkko E. Hearing impairment among adults: the  
4 389 impact of cardiovascular diseases and cardiovascular risk factors. *Int J Audiol*. 2015;54:265-273.  
5 390 37. Hong JW, Jeon JH, Ku CR, Noh JH, Yoo HJ, Kim DJ. The prevalence and factors associated with  
6 391 hearing impairment in the Korean adults: the 2010-2012 Korea National Health and Nutrition  
7 392 Examination Survey (observational study). *Medicine (Baltimore)*. 2015;94:e611.  
8 393 38. Chang J, Ryou N, Jun HJ, Hwang SY, Song JJ, Chae SW. Effect of cigarette smoking and passive  
9 394 smoking on hearing impairment: data from a population-based study. *PLoS One*. 2016;11:e0146608.  
10 395 39. Park YH, Shin SH, Byun SW, Kim JY. Age- and Gender-Related Mean Hearing Threshold in a  
11 396 Highly-Screened Population: The Korean National Health and Nutrition Examination Survey 2010-  
12 397 2012. *PLoS One*. 2016;11:e0150783.  
13 398 40. Hoffman HJ, Dobie RA, Losonczy KG, Themann CL, Flamme GA. Declining prevalence of hearing  
14 399 loss in US adults aged 20 to 69 years. *JAMA Otolaryngol Head Neck Surg*. 2017;143:274-285.  
15 400 41. Su BM, Chan DK. Prevalence of Hearing Loss in US Children and Adolescents: Findings from  
16 401 NHANES 1988-2010. *JAMA Otolaryngol Head Neck Surg*. 2017;143:920-927.  
17 402 42. Bainbridge KE, Hoffman HJ, Cowie CC. Diabetes and hearing impairment in the United States:  
18 403 audiometric evidence from the National Health and Nutrition Examination Survey, 1999 to 2004. *Ann*  
19 404 *Intern Med*. 2008;149:1-10.  
20 405  
21 406  
22  
23  
24  
25  
26  
27  
28  
29  
30  
31  
32  
33  
34  
35  
36  
37  
38  
39  
40  
41  
42  
43  
44  
45  
46  
47  
48  
49  
50  
51  
52  
53  
54  
55  
56  
57  
58  
59  
60

407 **Tables**

## 408 Table 1

409 Standardized questions to assess the presence and sequels of hearing problems

410 1. Do you experience a hearing loss?

411 2. Does a hearing problem make you feel embarrassed when meeting new people?

412 3. Does a hearing problem make you feel frustrated when talking to members of your family?

413 4. Do you have difficulties hearing when someone speaks in a whisper?

414 5. Do you feel handicapped by a hearing problem?

415 6. Does a hearing problem cause you difficulties when visiting friends, relatives, or neighbors?

416 7. Does a hearing problem make you attending religious services less often than you would like?

417 8. Does a hearing problem make you having arguments with family members?

418 9. Does a hearing problem cause you difficulties when listening to TV or radio?

419 10. Do you feel that any difficulty with your hearing limits or does it hamper your personal or social

420 life?

421 11. Does a hearing problem cause you difficulty when you are in a restaurant together with relatives or

422 friends?

423

424

425

426

427 Table 2

428 Mean hearing loss score in the Ural Eye and Medical Study, stratified by sex and age

429

| Age Group (Years) | n   | Hearing Loss Score | 95% Confidence Intervals |
|-------------------|-----|--------------------|--------------------------|
| Men               |     |                    |                          |
| 40-44             | 209 | 2.1 ± 7.4          | 1.0, 3.1                 |
| 45-49             | 350 | 1.9 ± 6.9          | 1.2, 2.7                 |
| 50-54             | 422 | 2.9 ± 8.4          | 2.1, 3.7                 |
| 55-59             | 471 | 4.7 ± 10.6         | 3.7, 5.6                 |
| 60-64             | 383 | 7.6 ± 13.2         | 6.3, 8.9                 |
| 65-69             | 273 | 8.5 ± 13.4         | 6.9, 10.1                |
| 70-74             | 124 | 8.5 ± 13.1         | 6.1, 10.8                |
| 75-79             | 150 | 10.9 ± 14.7        | 8.5, 13.3                |
| 80+               | 68  | 15.9 ± 16.2        | 12.0, 19.8               |
| Women             |     |                    |                          |
| 40-44             | 252 | 1.2 ± 4.4          | 0.7, 1.8                 |
| 45-49             | 361 | 2.2 ± 7.1          | 1.4, 2.9                 |
| 50-54             | 465 | 3.1 ± 8.7          | 2.3, 3.9                 |
| 55-59             | 500 | 4.1 ± 9.6          | 3.3, 5.0                 |
| 60-64             | 449 | 4.8 ± 10.0         | 3.9, 5.7                 |
| 65-69             | 430 | 5.8 ± 11.3         | 4.7, 6.8                 |
| 70-74             | 182 | 6.2 ± 10.9         | 4.6, 7.8                 |
| 75-79             | 203 | 10.8 ± 14.8        | 8.7, 12.8                |
| 80+               | 105 | 15.3 ± 15.6        | 12.2, 18.3               |



433 Table 3  
 434 Associations (multivariate analysis) between the hearing loss score and other systemic parameters in  
 435 the Ural Eye and Medical Study  
 436  
 437

| Parameters                                                                                                                                                                                                        | P-Value | Standardized Regression Coefficient beta | Non-Standardized Regression Coefficient B | 95% Confidence Interval | Variance Inflation Factor |
|-------------------------------------------------------------------------------------------------------------------------------------------------------------------------------------------------------------------|---------|------------------------------------------|-------------------------------------------|-------------------------|---------------------------|
| Age (Years)                                                                                                                                                                                                       | <0.001  | 0.23                                     | 0.27                                      | 0.23, 0.31              | 1.14                      |
| Sex (Women / Men)                                                                                                                                                                                                 | <0.001  | 0.07                                     | 1.69                                      | 0.89, 2.50              | 1.13                      |
| Depression Score                                                                                                                                                                                                  | <0.001  | 0.07                                     | 0.22                                      | 0.11, 0.33              | 1.11                      |
| History of Headache                                                                                                                                                                                               | <0.001  | 0.07                                     | 1.50                                      | 0.71, 2.29              | 1.09                      |
| History of Cancer                                                                                                                                                                                                 | 0.008   | 0.05                                     | 3.53                                      | 0.91, 6.16              | 1.01                      |
| History of Cardiovascular Disease Including Stroke                                                                                                                                                                | 0.003   | 0.05                                     | 1.45                                      | 0.51, 2.39              | 1.11                      |
| History of Osteoarthritis                                                                                                                                                                                         | 0.006   | 0.05                                     | 1.43                                      | 0.42, 2.44              | 1.06                      |
| History of Skin Disease                                                                                                                                                                                           | 0.01    | 0.04                                     | 2.18                                      | 0.48, 3.89              | 1.01                      |
| In a week how many days do you eat fruits?                                                                                                                                                                        | 0.02    | -0.04                                    | -0.24                                     | -0.44, -0.04            | 1.03                      |
| „Does your work involve physically vigorous activity (like heavy lifting or digging) or moderately intensive activity (like brisk walking or carrying light loads during work for at least 10 minutes at a time?“ | 0.042   | 0.04                                     | 1.13                                      | 0.04, 2.22              | 1.04                      |
| „How many days a week do you do such physically vigorous activity during work?“                                                                                                                                   | 0.008   | 0.05                                     | 0.36                                      | 0.10, 0.63              | 1.10                      |
| „In your leisure time, do you do any moderate intensity activities like                                                                                                                                           | <0.001  | 0.09                                     | 1.96                                      | 1.19, 2.74              | 1.03                      |

1  
2  
3  
4  
5  
6  
7  
8  
9  
10  
11  
12  
13  
14  
15  
16  
17  
18  
19  
20  
21  
22  
23  
24  
25  
26  
27  
28  
29  
30  
31  
32  
33  
34  
35  
36  
37  
38  
39  
40  
41  
42  
43  
44  
45  
46  
47  
48  
49  
50  
51  
52  
53  
54  
55  
56  
57  
58  
59  
60

|                                                                        |  |  |  |  |  |
|------------------------------------------------------------------------|--|--|--|--|--|
| brisk walking, cycling or swimming for at least 10 minutes at a time?" |  |  |  |  |  |
|------------------------------------------------------------------------|--|--|--|--|--|

438  
439  
440  
441

For peer review only

442 Table 4  
 443 Prevalence of self-reported hearing loss (definite answer of "Yes" (in contrast to the answer of  
 444 "Sometimes" or "No") to the question "Do you experience a hearing loss?") stratified by age and  
 445 gender in the Ural Eye and Medical Study

| Age Group (Years) | n   | Prevalence of Self-Reported Hearing Loss | 95% Confidence Intervals |
|-------------------|-----|------------------------------------------|--------------------------|
| Men               |     |                                          |                          |
| 40-44             | 209 | 10.1                                     | 5.9, 14.2                |
| 45-49             | 350 | 13.4                                     | 9.8, 17.0                |
| 50-54             | 422 | 17.5                                     | 13.9, 21.2               |
| 55-59             | 471 | 22.3                                     | 18.5, 26.1               |
| 60-64             | 383 | 32.3                                     | 27.7, 37.1               |
| 65-69             | 273 | 40.3                                     | 34.4, 46.2               |
| 70-74             | 124 | 41.1                                     | 32.3, 49.9               |
| 75-79             | 150 | 51.3                                     | 43.2, 59.4               |
| 80+               | 68  | 60.3                                     | 48.4, 72.2               |
| Women             |     |                                          |                          |
| 40-44             | 252 | 11.5                                     | 7.5, 15.5                |
| 45-49             | 361 | 14.7                                     | 11.0, 18.4               |
| 50-54             | 465 | 18.1                                     | 14.6, 21.6               |
| 55-59             | 500 | 23.0                                     | 19.3, 26.7               |
| 60-64             | 449 | 27.4                                     | 23.3, 31.5               |
| 65-69             | 430 | 31.9                                     | 27.4, 36.3               |
| 70-74             | 182 | 32.4                                     | 25.6, 39.3               |
| 75-79             | 203 | 46.8                                     | 39.9, 53.7               |
| 80+               | 105 | 58.1                                     | 48.5, 67.7               |

1  
2  
3 451 Table 5  
4 452 Associations (multivariate analysis) between the prevalence of hearing loss loss (definite answer of  
5 453 "Yes" (in contrast to the answer of "Sometimes" or "No") to the question "Do you experience a hearing  
6 454 loss?") and other systemic parameters in the Ural Eye and Medical Study  
7  
8 455  
9 456

| Parameters                                                                                                                                                                                                        | P-Value | Odds Ratio | 95% Confidence Interval |
|-------------------------------------------------------------------------------------------------------------------------------------------------------------------------------------------------------------------|---------|------------|-------------------------|
| Age (Years)                                                                                                                                                                                                       | <0.001  | 1.06       | 1.06, 1.07              |
| Sex (Men / Women)                                                                                                                                                                                                 | <0.001  | 1.26       | 1.09, 1.47              |
| Depression Score                                                                                                                                                                                                  | <0.001  | 1.06       | 1.04, 1.08              |
| History of Headache                                                                                                                                                                                               | 0.001   | 1.27       | 1.10, 1.47              |
| History of Cancer                                                                                                                                                                                                 | 0.04    | 1.51       | 1.02, 2.24              |
| History of Cardiovascular Disease Including Stroke                                                                                                                                                                | 0.001   | 1.32       | 1.13, 1.55              |
| History of Osteoarthritis                                                                                                                                                                                         | <0.001  | 1.40       | 1.18, 1.67              |
| „Does your work involve physically vigorous activity (like heavy lifting or digging) or moderately intensive activity (like brisk walking or carrying light loads during work for at least 10 minutes at a time?“ | <0.001  | 1.40       | 1.21, 1.62              |
| Alcohol consumption                                                                                                                                                                                               | <0.001  | 1.51       | 1.28, 1.78              |
| Dry eye Feeling                                                                                                                                                                                                   | <0.001  | 1.67       | 1.30, 2.16              |

35 457  
36 458  
37 459  
38 460  
39 461  
40 462  
41 463  
42 464  
43  
44  
45  
46  
47  
48  
49  
50  
51  
52  
53  
54  
55  
56  
57  
58  
59  
60

1  
2  
3 465 Fig. 1  
4 466 Graph showing the distribution of the hearing loss score stratified by age and gender in the Ural Eye  
5 467 and Medical Study

6 468  
7  
8 469 Fig. 2  
9 470 Graph showing the prevalence of self-reported hearing loss (defined by a definite answer of "Yes" (in  
10 471 contrast to the answer of "Sometimes" or "No") to the question "Do you experience a hearing loss?")  
12 472 stratified by age and gender in the Ural Eye and Medical Study  
13  
14  
15  
16  
17  
18  
19  
20  
21  
22  
23  
24  
25  
26  
27  
28  
29  
30  
31  
32  
33  
34  
35  
36  
37  
38  
39  
40  
41  
42  
43  
44  
45  
46  
47  
48  
49  
50  
51  
52  
53  
54  
55  
56  
57  
58  
59  
60

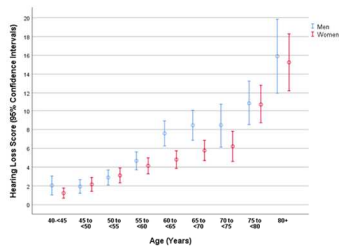

323x199mm (120 x 120 DPI)

Review only

1  
2  
3  
4  
5  
6  
7  
8  
9  
10  
11  
12  
13  
14  
15  
16  
17  
18  
19  
20  
21  
22  
23  
24  
25  
26  
27  
28  
29  
30  
31  
32  
33  
34  
35  
36  
37  
38  
39  
40  
41  
42  
43  
44  
45  
46  
47  
48  
49  
50  
51  
52  
53  
54  
55  
56  
57  
58  
59  
60

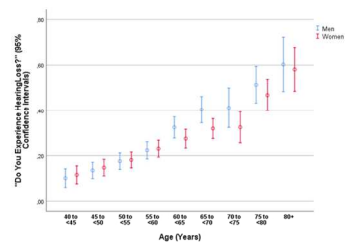

323x199mm (120 x 120 DPI)

Review only

1  
2  
3  
4  
5  
6  
7  
8  
9  
10  
11  
12  
13  
14  
15  
16  
17  
18  
19  
20  
21  
22  
23  
24  
25  
26  
27  
28  
29  
30  
31  
32  
33  
34  
35  
36  
37  
38  
39  
40  
41  
42  
43  
44  
45  
46  
47  
48  
49  
50  
51  
52  
53  
54  
55  
56  
57  
58  
59  
60

1 Supplementary Table 1  
2 Associations between the hearing loss score and other systemic parameters after adjusting for age in  
3 the Ural Eye and Medical Study  
4

| Parameter                                                                                        | P-Value | Standardized Regression Coefficient beta | Non-Standardized Regression Coefficient B | 95% Confidence Interval of B |
|--------------------------------------------------------------------------------------------------|---------|------------------------------------------|-------------------------------------------|------------------------------|
| Gender: Women / Men                                                                              | <0.001  | 0.05                                     | 1.03                                      | 0.47, 1.60                   |
| Urban / rural region of habitation                                                               | 0.002   | 0.04                                     | 0.93                                      | 0.34, 1.52                   |
| Family status: Married versus any other status                                                   | 0.64    |                                          |                                           |                              |
| Family type: Joint (three generations) / nuclear (two generations) / single / family of 2 people | 0.02    | 0.03                                     | 0.29                                      | 0.04, 0.53                   |
| Ethnicity: Russian / any other ethnicity                                                         | 0.88    | 0.002                                    | 0.05                                      | -0.63, 0.74                  |
| Body height (cm)                                                                                 | 0.82    | 0.003                                    | 0.004                                     | -0.03, 0.04                  |
| Body weight (kg)                                                                                 | 0.03    | -0.03                                    | -0.02                                     | -0.04, -0.002                |
| Body mass index (kg/m <sup>2</sup> )                                                             | 0.01    | -0.03                                    | -0.07                                     | -0.13, -0.02                 |
| Waist circumference (cm)                                                                         | 0.02    | -0.03                                    | -0.03                                     | -0.05, -0.004                |
| Hip circumference cm)                                                                            | 0.01    | -0.03                                    | -0.03                                     | -0.05, -0.006                |
| Waist-Hip-Ratio                                                                                  | 0.61    | -0.007                                   | -0.81                                     | -3.91, 2.29                  |
| Socioeconomic parameters                                                                         |         |                                          |                                           |                              |
| Level of education                                                                               | 0.49    | 0.009                                    | 0.06                                      | -0.11, 0.23                  |
| Monthly Income (Below poverty line / average / above average / high)                             | 0.99    | 0.000                                    | -0.01                                     | -0.58, 0.58                  |
| Own ownership of house (yes / no)                                                                | 0.90    | -0.002                                   | -0.09                                     | -1.51, 1.33                  |
| Own ownership of refrigerator (yes / no)                                                         | 0.19    | -0.03                                    | -2.98                                     | -7.40, 1.44                  |
| Own ownership of second house (yes / no)                                                         | 0.03    | -0.04                                    | -1.15                                     | -2.18, -0.12                 |
| Own ownership of telephone (yes / no)                                                            | 0.13    | -0.02                                    | -0.64                                     | -1.48, 0.19                  |
| Own ownership of smartphone (yes / no)                                                           | 0.87    | -0.003                                   | -0.07                                     | -0.91, 0.77                  |
| Own ownership of television set (yes / no)                                                       | 0.13    | -0.02                                    | -0.64                                     | -1.48, 0.19                  |
| Own ownership of car (yes / no)                                                                  | 0.07    | -0.03                                    | -0.82                                     | -1.72, 0.07                  |
| Own ownership of two-wheeler (yes / no)                                                          | 0.87    | -0.002                                   | -0.05                                     | -0.65, 0.56                  |
| Own ownership of tractor (yes / no)                                                              | 0.73    | 0.007                                    | 0.34                                      | -1.55, 2.23                  |



|                                                                                                                                                                                       |        |       |        |               |
|---------------------------------------------------------------------------------------------------------------------------------------------------------------------------------------|--------|-------|--------|---------------|
| Own ownership of bullock cart (yes / no)                                                                                                                                              | 0.76   | 0.006 | 0.32   | -1.71, 2.24   |
| Own ownership of computer / laptop (yes / no)                                                                                                                                         | 0.13   | -0.03 | -0.71  | -1.62, 0.21   |
| Physical activity                                                                                                                                                                     |        |       |        |               |
| How long is your usual work day? (Minutes)                                                                                                                                            | 0.17   | -0.02 | -0.001 | -0.002, 0.000 |
| Does your work involve mostly sitting or standing with less than 10 minutes of walking at a time? (Yes / No)                                                                          | 0.76   | 0.004 | 0.11   | -0.57, 0.78   |
| Does your work involve physically vigorous activity (like heavy lifting or digging) or physically moderate intensity activity (like brisk walking or carrying light loads) (Yes / No) | <0.001 | 0.07  | 1.59   | 0.97, 2.20    |
| How many days a week do you do such physically vigorous activity during work? (Yes / No)                                                                                              | 0.001  | 0.06  | 0.47   | 0.21, 0.73    |
| On a usual day how much time do you spend on such physically vigorous work during work? (Minutes)                                                                                     | <0.001 | 0.06  | 0.002  | 0.001, 0.004  |
| Does your work involve physically moderate-intensive activity, like brisk walking or carrying light loads for at least 10 minutes at a time?                                          | <0.001 | 0.06  | 1.32   | 0.66, 1.98    |
| Do you walk or use a bicycle (pedal cycle) for at least 10 minutes continuously to get to and from places?                                                                            | 0.63   | 0.006 | 0.25   | -0.77, 1.26   |
| In your leisure time, do you do any moderate intensity activities like brisk walking, cycling or swimming for at least 10 minutes at a time?                                          | <0.001 | 0.09  | 2.09   | 1.47, 2.72    |
| Over the past 7 days, how much time did you spend sitting or reclining on a typical day?                                                                                              | 0.40   | 0.01  | 0.000  | 0.000, 0.000  |
| History of diseases                                                                                                                                                                   |        |       |        |               |
| History of angina pectoris                                                                                                                                                            | 0.96   | 0.001 | 0.03   | -0.97, 1-.02  |
| History of asthma                                                                                                                                                                     | 0.03   | 0.03  | 1.95   | 0.20, 3.71    |
| History of arterial hypertension                                                                                                                                                      | 0.01   | 0.03  | 0.76   | 0.17, 1.36    |

|                                                       |        |        |        |              |
|-------------------------------------------------------|--------|--------|--------|--------------|
| History of arthritis                                  | <0.001 | 0.07   | 1.65   | 1.00, 2.29   |
| History of previous bone fractures                    | 0.18   | 0.02   | 0.42   | -0.19, 1.03  |
| History of low back pain                              | 0.001  | 0.04   | 0.97   | 0.41, 1.53   |
| History of thoracic spine pain                        | <0.001 | 0.07   | 1.72   | 1.06, 2.38   |
| History of neck pain                                  | <0.001 | 0.05   | 1.18   | 0.56, 1.80   |
| History of headache                                   | <0.001 | 0.07   | 1.54   | 0.98, 2.10   |
| History of cancer                                     | 0.006  | 0.04   | 2.38   | 0.67, 4.08   |
| History of cardiovascular disorders including stroke  | <0.001 | 0.05   | 1.27   | 0.62, 1.92   |
| History of dementia                                   | 0.004  | 0.04   | 5.05   | 1.63, 8.48   |
| History of diabetes mellitus                          | 0.52   | -0.009 | -0.34  | -1.38, 0.69  |
| History of diarrhea                                   | 0.86   | 0.002  | 0.37   | -3.62, 4.36  |
| History of iron-deficiency anemia                     | 0.34   | 0.01   | 0.59   | -0.63, 1.81  |
| History of low blood pressure and hospital admittance | 0.97   | -0.001 | -0.03  | -1.67, 1.54  |
| History of osteoarthritis                             | <0.001 | 0.07   | 1.89   | 1.16, 2.62   |
| History of skin disease                               | 0.07   | 0.02   | 1.16   | -0.09, 2.41  |
| History of thyreopathy                                | 0.92   | -0.001 | -0.05  | -1.00, 0.90  |
| History of tumbling                                   | 0.11   | 0.02   | 0.58   | -0.13, 1.29  |
| History of unconsciousness                            | 0.02   | 0.03   | 1.19   | 0.17, 2.22   |
| Age of the last menstrual bleeding (years)            | 0.66   | -0.009 | -0.02  | -0.11, 0.07  |
| Age of last regular menstrual bleeding (years)        | 0.92   | -0.002 | -0.005 | -0.09, 0.09  |
| History of menopause                                  | 0.55   | -0.01  | -0.35  | -1.51, 0.80  |
| Blood concentrations (mmol/L) of:                     |        |        |        |              |
| Alanine aminotransferase (IU/L)                       | 0.41   | 0.01   | 0.01   | -0.01, 0.03  |
| Aspartate aminotransferase (IU/L)                     | 0.50   | 0.009  | 0.009  | -0.02, 0.03  |
| Bilirubin, total (µmol/L)                             | 0.65   | 0.006  | 0.006  | -0.02, 0.03  |
| High-density lipoproteins (mmol/L)                    | 0.78   | -0.004 | -0.05  | -0.36, 0.27  |
| Low-density lipoproteins (mmol/L)                     | 0.62   | 0.007  | 0.06   | -0.18, 0.30  |
| Cholesterol (mmol/L)                                  | 0.79   | -0.03  | -0.02  | -0.19, 0.14  |
| Triglycerides (mmol/L)                                | 0.28   | -0.01  | -0.21  | -0.59, 0.17  |
| Rheumatoid factor (IU/mL)                             | 0.14   | -0.02  | -0.25  | -0.58, 0.09  |
| Erythrocyte sedimentation rate (mm / hour)            | 0.95   | -0.001 | -0.001 | -0.03, 0.03  |
| Glucose (mmol/L)                                      | 0.48   | -0.009 | -0.06  | -0.23, 0.11  |
| Prevalence of diabetes mellitus                       | 0.12   | -0.02  | -0.71  | -1.62, 0.20  |
| Creatinine (µmol/L)                                   | 0.45   | 0.01   | 0.004  | -0.007, 0.02 |
| Urea (mmol/L)                                         | 0.22   | -0.02  | -0.12  | -0.32, 0.07  |

|                                                                 |        |        |       |              |
|-----------------------------------------------------------------|--------|--------|-------|--------------|
| Residual nitrogen (g/L)                                         | 0.74   | -0.004 | -0.66 | -4.53, 3.21  |
| Total protein (g/L)                                             | 0.75   | 0.004  | 0.007 | -0.04, 0.05  |
| International normalized ratio (INR)                            | 0.13   | -0.02  | -1.50 | -3.41, 0.42  |
| Prothrombin time (%)                                            | 0.98   | 0.000  | 0.007 | -0.53, 0.54  |
| Hemoglobin                                                      | 0.45   | -0.01  | 0.007 | -0.03, 0.01  |
| Erythrocytes (10 <sup>9</sup> cells / $\mu$ L)                  | 0.93   | 0.001  | 0.04  | -0.71, 0.78  |
| Leukocytes (10 <sup>9</sup> cells / L)                          | 0.55   | -0.008 | -0.06 | -0.26, 0.14  |
| Rod-core granulocyte (% of leukocytes)                          | 0.77   | 0.004  | 0.03  | -0.18, 0.24  |
| Segment nuclear granulocyte (% of leukocytes)                   | 0.45   | -0.01  | -0.02 | -0.05, 0.02  |
| Eosinophil granulocytes (% of leukocytes)                       | 0.42   | -0.01  | -0.12 | -0.40, 0.17  |
| Lymphocytes (% of leukocytes)                                   | 0.11   | 0.02   | 0.04  | -0.008, 0.08 |
| Monocytes (% of leukocytes)                                     | 0.49   | -0.009 | -0.04 | -0.17, 0.08  |
| Blood pressure, systolic (mmHg)                                 | 0.74   | 0.005  | 0.002 | -0.01, 0.02  |
| Blood pressure, diastolic (mmHg)                                | 0.77   | 0.004  | 0.004 | -0.02, 0.03  |
| Blood pressure, mean (mmHg)                                     | 0.45   | .001   | -0.01 | -0.05, 0.02  |
| Prevalence of arterial hypertension                             | 0.03   | 0.03   | 0.64  | 0.05, 1.22   |
| Prevalence of chronic obstructive pulmonary disease             | 0.67   | 0.006  | 0.24  | -0.87, 1.35  |
| Diet                                                            |        |        |       |              |
| Vegetarian diet / mixed diet                                    | 0.57   | 0.007  | 2.43  | -6.01, 10.9  |
| Number of meals per day                                         | 0.22   | 0.02   | 0.23  | -0.13, 0.58  |
| In a week how many days do you eat fruits?                      | 0.001  | -0.05  | -0.25 | -0.40, -0.11 |
| In a week how many days do you eat vegetables?                  | <0.001 | 0.05   | 0.005 | 0.002, 0.008 |
| Type of oil used for cooking: vegetable oil / non-vegetable oil | 0.058  | -0.03  | -0.20 | -0.40, 0.006 |
| Salt consumed per day (g)                                       | 0.10   | 0.02   | 0.002 | 0.000, 0.005 |
| Degree of processing of meat (weak / medium / well done)        | 0.24   | -0.02  | -0.64 | -1.71, 0.43  |
| Smoking                                                         |        |        |       |              |
| Do you currently smoke any tobacco products? (yes)              | 0.17   | 0.02   | 0.59  | -0.26, 1.44  |
| Do you smoke daily? (yes / no)                                  | 0.39   | 0.01   | 0.38  | -0.48, 1.24  |
| Package years (package = 20 cigarettes)                         | 0.25   | 0.02   | 0.01  | -0.009, 0.04 |
| Alcohol Consumption                                             |        |        |       |              |

|                                                                                                           |        |      |       |               |
|-----------------------------------------------------------------------------------------------------------|--------|------|-------|---------------|
| Alcohol consumed such as beer, whisky, rum, gin brandy or other local products? (yes / no)                | 0.05   | 0.03 | 0.67  | -0.008, 1.35  |
| How many alcoholic drinks do you have on a typical day when you are drinking)                             | 0.16   | 0.04 | 0.003 | -0.001, 0.007 |
| How often do you have 6 or more drinks on one occasion? (never / rarely / sometimes / often / cannot say) | 0.36   | 0.03 | 0.38  | -0.43, 1.19   |
| Depression                                                                                                |        |      |       |               |
| Depression score                                                                                          | <0.001 | 0.08 | 0.25  | 0.17, 0.32    |
| State-Trait Anxiety Inventory (STAI)                                                                      |        |      |       |               |
| Anxiety score                                                                                             | <0.001 | 0.08 | 0.25  | 0.17, 0.33    |
| Dynamometry                                                                                               |        |      |       |               |
| Manual dynamometry, right hand (dekaNewton)                                                               | 0.40   | 0.01 | 0.01  | -0.02, 0.04   |
| Manual dynamometry, left hand (dekaNewton)                                                                | 0.08   | 0.03 | 0.02  | -0.003, 0.05  |

5  
6  
7

# BMJ Open

## Self-Reported Hearing Loss in Russians. The population-based Ural Eye and Medical Study

|                                 |                                                                                                                                                                                                                                                                                                                                                                                                                                                                                                                                                                                                                                                                                                                                                                                                                                                                                                                                                                                                                                                                                                                                                                                                                                                                                                                                                                      |
|---------------------------------|----------------------------------------------------------------------------------------------------------------------------------------------------------------------------------------------------------------------------------------------------------------------------------------------------------------------------------------------------------------------------------------------------------------------------------------------------------------------------------------------------------------------------------------------------------------------------------------------------------------------------------------------------------------------------------------------------------------------------------------------------------------------------------------------------------------------------------------------------------------------------------------------------------------------------------------------------------------------------------------------------------------------------------------------------------------------------------------------------------------------------------------------------------------------------------------------------------------------------------------------------------------------------------------------------------------------------------------------------------------------|
| Journal:                        | <i>BMJ Open</i>                                                                                                                                                                                                                                                                                                                                                                                                                                                                                                                                                                                                                                                                                                                                                                                                                                                                                                                                                                                                                                                                                                                                                                                                                                                                                                                                                      |
| Manuscript ID                   | bmjopen-2018-024644.R1                                                                                                                                                                                                                                                                                                                                                                                                                                                                                                                                                                                                                                                                                                                                                                                                                                                                                                                                                                                                                                                                                                                                                                                                                                                                                                                                               |
| Article Type:                   | Research                                                                                                                                                                                                                                                                                                                                                                                                                                                                                                                                                                                                                                                                                                                                                                                                                                                                                                                                                                                                                                                                                                                                                                                                                                                                                                                                                             |
| Date Submitted by the Author:   | 04-Oct-2018                                                                                                                                                                                                                                                                                                                                                                                                                                                                                                                                                                                                                                                                                                                                                                                                                                                                                                                                                                                                                                                                                                                                                                                                                                                                                                                                                          |
| Complete List of Authors:       | Bikbov, Mukharram; Ufa Eye Research Institute, Ufa, Bashkortostan, Russia<br>Fayzrakhmanov , Rinat; Ufa Eye Research Institute, Ufa, Bashkortostan, Russia<br>Kazakbaeva, Gyulli; Ufa Eye Research Institute, Ufa, Bashkortostan, Russia<br>Zainullin, Rinat; Ufa Eye Research Institute, Ufa, Bashkortostan, Russia<br>Salavatova, Venera; Ufa Eye Research Institute, Ufa, Bashkortostan, Russia<br>Gilmanshin, Timur; Ufa Eye Research Institute, Ufa, Bashkortostan, Russia<br>Arslangareeva, INga; Ufa Eye Research Institute, Ufa, Bashkortostan, Russia<br>Nikitin, Nikolai; Ufa Eye Research Institute, Ufa, Bashkortostan, Russia<br>Panda-Jonas, Songhomitra; Augenpraxis Jonas, Seegartenklinik, Heidelberg<br>Mukhamadieva, Svetlana; Ufa Eye Research Institute, Ufa, Bashkortostan, Russia<br>Yakupova, Dilya; Ufa Eye Research Institute, Ufa, Bashkortostan, Russia<br>Khikmatullin, Renat; Ufa Eye Research Institute, Ufa, Bashkortostan, Russia<br>Aminev, Said ; Ufa Eye Research Institute, Ufa, Bashkortostan, Russia<br>Nuriev, Ildar ; Ufa Eye Research Institute, Ufa, Bashkortostan, Russia<br>Zaynetdinov , Artur; Ufa Eye Research Institute, Ufa, Bashkortostan, Russia<br>Uzianbaeva, Yulia ; Ufa Eye Research Institute, Ufa, Bashkortostan, Russia<br>Jonas, Jost; Department of Ophthalmology; Ruprecht-Karls-University Heidelberg |
| <b>Primary Subject Heading</b>: | Epidemiology                                                                                                                                                                                                                                                                                                                                                                                                                                                                                                                                                                                                                                                                                                                                                                                                                                                                                                                                                                                                                                                                                                                                                                                                                                                                                                                                                         |
| Secondary Subject Heading:      | Global health, Occupational and environmental medicine, Ear, nose and throat/otolaryngology, Public health                                                                                                                                                                                                                                                                                                                                                                                                                                                                                                                                                                                                                                                                                                                                                                                                                                                                                                                                                                                                                                                                                                                                                                                                                                                           |
| Keywords:                       | EPIDEMIOLOGY, OTOLARYNGOLOGY, Adult otolaryngology < OTOLARYNGOLOGY                                                                                                                                                                                                                                                                                                                                                                                                                                                                                                                                                                                                                                                                                                                                                                                                                                                                                                                                                                                                                                                                                                                                                                                                                                                                                                  |
|                                 |                                                                                                                                                                                                                                                                                                                                                                                                                                                                                                                                                                                                                                                                                                                                                                                                                                                                                                                                                                                                                                                                                                                                                                                                                                                                                                                                                                      |

1  
2  
3  
4  
5  
6  
7  
8  
9  
10  
11  
12  
13  
14  
15  
16  
17  
18  
19  
20  
21  
22  
23  
24  
25  
26  
27  
28  
29  
30  
31  
32  
33  
34  
35  
36  
37  
38  
39  
40  
41  
42  
43  
44  
45  
46  
47  
48  
49  
50  
51  
52  
53  
54  
55  
56  
57  
58  
59  
60

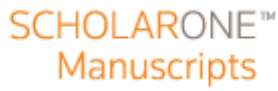

1  
2  
3 1  
4 2  
5 3  
6 3 **Self-Reported Hearing Loss in Russians. The population-based Ural Eye and Medical Study**  
7 4  
8 5  
9 6  
10 6

11 7 Mukharram M. Bikbov MD PhD(1), Rinat R. Fayzrakhmanov, MD PhD(1), Gyulli M. Kazakbaeva,  
12 8 MD(1), Rinat M. Zainullin, MD(1), Venera F. Salavatova, MD(1), Timur R. Gilmanshin, MD(1), Inga I.  
13 9 Arslangareeva, MD(1), Nikolai A. Nikitin, MD(1), Songhomitra Panda-Jonas, MD (2), Svetlana R.  
14 10 Mukhamadieva, MD(1), Dilya F. Yakupova, MD(1), Renat I. Khikmatullin, MD(1), Said K. Aminev,  
15 11 MD(1), Ildar F. Nuriev, MD(1), Artur F. Zaynetdinov MD(1), Yulia V. Uzianbaeva, MD(1), Jost B. Jonas  
16 12 MD(3)  
17  
18  
19  
20  
21  
22  
23  
24  
25  
26  
27  
28  
29  
30  
31  
32  
33  
34  
35

36 16 (1) Ufa Eye Research Institute, Ufa, Bashkortostan, Russia

37 17 (2) Augenpraxis Jonas, Seegartenklinik, Heidelberg

38 18 (3) Department of Ophthalmology, Medical Faculty Mannheim of the Ruprecht-Karls-University of  
39 19 Heidelberg, Germany  
40  
41  
42  
43  
44  
45  
46  
47  
48  
49  
50  
51  
52  
53  
54  
55  
56  
57  
58  
59  
60

23 Running title: Hearing loss in Russians

24 Key words: Hearing loss; Presbyakusis; Audiometry; Depression; Population-based study; Ural Eye  
25 and Medical Study;

26 Funding: None

27 Competing interests statement: None declared

28 Corresponding author: Prof. Mukharram Bikbov, Ufa Eye Research Institute, 90 Pushkin Street, Ufa  
29 450077, Bashkortostan, Russia; Tel.: +7(347)272-37-75; email: Bikbov.m@gmail.com; Prof. Jost  
30 Jonas, Department of Ophthalmology, Medical Faculty Mannheim, Theodor-Kutzerufer 1, 68167  
31 Mannheim, Germany; Tel.: +49-6221-3929320; email: Jost.Jonas@medma.uni-heidelberg.de.

32 Author Contribution: Design and conception: M.M. Bikbov, Fayzrakhmanov RR, G.M. Kazakbaeva,  
33 J.B. Jonas; Data assessment: Bikbov MM, Fayzrakhmanov RR, Kazakbaeva GM, Zainullin RM,  
34 Arslangareeva II, Gilmanshin TR, Salavatova VF, Nikitin NA, Mukhamadieva SR, Yakupova DF,  
35 Khikmatullin RI, Zaynetdinov AF, Uzianbaeva YV, Aminev SK, Nuriev IF, Jonas JB; Statistical  
36 analysis: J.B. Jonas, S. Panda-Jonas; Writing of the manuscript: J.B. Jonas, S. Panda-Jonas; Editing  
37 and final approval of the manuscript: Bikbov MM, Fayzrakhmanov RR, Kazakbaeva GM, Zainullin RM,  
38 Salavatova VF, Gilmanshin TR, Arslangareeva II, Nikitin NA, S. Panda-Jonas, Mukhamadieva SR,  
39 Yakupova DF, Khikmatullin RI, Aminev SK, Nuriev IF, Zaynetdinov AF, Uzianbaeva YV, Jonas JB  
40 - Data sharing statement: No additional data available

## Abstract

**Objectives:** With information about frequency of hearing loss in Russia and Eastern Europe mostly missing, we assessed the prevalence of hearing loss in a Russian population.

**Setting:** The population-based study Ural Eye and Medical Study was conducted in a rural and urban region of Bashkortostan/Russia.

**Participants:** With an inclusion criterion of 40+ years, the study included 5899 (80.5%) out of 7328 eligible individuals (mean age:59.0±10.7 years; range:40-94 years).

**Primary and secondary outcome measures:** Hearing loss examined in 5397 (91.5%) study participants, as it was assessed in a standardized interview with questions of the "Hearing Handicap Inventory for the Elderly Screening Version (HHIE-S)".

**Results:** The prevalence of self-reported hearing loss (26.1%;95% confidence interval [CI]:24.2,27.2) increased from 10.9% [95%CI:8.0,13.7] in the 40-45 year-olds to 59.0% [51.6,66.4] in the 80+ year-olds. It was higher for men than for women in the age group of 60-80 years (38.93% [35.8,42.1] vs. 32.8% [30.2,35.3]; $P=0.003$ ). In multivariable analysis, higher prevalence of hearing loss was associated with older age ( $P<0.001$ ;odds ratio (OR) (per year of age):1.06 [1.06,1.07]), male gender ( $P<0.001$ ;OR:1.26 [1.09,1.47]), higher depression score ( $P<0.001$ ;OR:1.06 [1.04,1.08]), and higher prevalence of headache ( $P=0.001$ ;OR:1.27 [1.10,1.47]), history of cardiovascular disease including stroke ( $P=0.001$ ;OR:1.32 [1.13,1.55]), osteoarthritis ( $P<0.001$ ;OR:1.40 [1.18,1.67]), physically vigorous activity during work ( $P<0.001$ ;OR:1.40 [1.21,1.62]), alcohol consumption ( $P<0.001$ ;OR:1.51 [1.28,1.78]) and dry eye feeling ( $P<0.001$ ;OR:1.67 [1.30,2.16]). It was marginally correlated with a higher anxiety score ( $P=0.07$ ;OR:1.03 [0.998,1.06]). It was independent of diabetes ( $P=0.52$ ), arterial hypertension ( $P=0.20$ ), level of education ( $P=0.11$ ), region of habitation ( $P=0.70$ ), blood concentration of high-density lipoproteins ( $P=0.17$ ) and low-density lipoproteins ( $P=0.52$ ), current smoking ( $P=0.95$ ) and smoking package years ( $P=0.37$ ), and best corrected visual acuity ( $P=0.93$ ).

**Conclusions:** As in other countries the prevalence of hearing loss is high in this elderly population in Russia. It is primarily or secondarily associated with older age, depression, male gender, cardiovascular disease and alcohol consumption.

## Article Summary

Strengths and limitations of this study:

- The assessment of hearing loss in an interview containing a series of 11 standardized questions without performing an audiometric examination was a limitation of the study.
- Although noise is a major determinant of hearing loss along with aging, the exposure to noise at the working place was not directly and specifically assessed in the study.
- Performing the study in Russia from where no population-based information on hearing loss has been available so far was a strength of the investigation.
- The study sample size of 5899 participants and the participation rate of 80.5% were strengths of the study.



- 1  
2  
3 82 • The relatively high number of parameters examined in addition to hearing loss and enabling a  
4 83 wide search for associations between hearing loss and other parameters was strength of the  
5  
6 84 investigation.  
7  
8  
9  
10  
11  
12  
13  
14  
15  
16  
17  
18  
19  
20  
21  
22  
23  
24  
25  
26  
27  
28  
29  
30  
31  
32  
33  
34  
35  
36  
37  
38  
39  
40  
41  
42  
43  
44  
45  
46  
47  
48  
49  
50  
51  
52  
53  
54  
55  
56  
57  
58  
59  
60
- The relatively high number of parameters examined in addition to hearing loss and enabling a wide search for associations between hearing loss and other parameters was strength of the investigation.

For peer review only

## 86 Introduction

87 Deficits in the function of sensory organs are major reasons for so called disability associated life  
88 years (DALYs).<sup>1</sup> In the Global Burden of Disease Study (GBD) 2016, sense organ diseases caused  
89 66.7 million DALYS (95% uncertainty interval (UI): 46.5 million to 92.3 million) or 2.8% of all DALYs in  
90 2016, up from 39.4 million DALYS (95%UI: 27.3 million to 54.5 million) in 1995 and 54.8 million DALYs  
91 (95%CI: 38.2 million to 76.0 million) in 2006.<sup>1</sup> Sense organ diseases-associated DALYs increased in  
92 the ranking of the most common causes of DALYs from position #16 in 1995 to rank #14 in 2006 and  
93 to rank #7 in 2016.<sup>1</sup> Age-related and other hearing loss accounted for 29.7 million DALYS (95%UI:  
94 25.3 million to 50.9 million) or 44.5% of all sense organs-associated DALYs in 2016.<sup>1</sup>

95 Despite its importance for public health, the prevalence of hearing loss and its associated  
96 factors have not widely been investigated worldwide.<sup>2-11</sup> For many countries, information on the  
97 prevalence of hearing loss has not been available yet, and the factors associated with hearing loss  
98 have not been examined in a detailed manner. It holds true in particular for Russia and Eastern  
99 Europe. We therefore conducted this study to assess the prevalence of hearing loss in a Russian  
100 population and to explore associations of hearing loss with other parameters such as gender, region of  
101 habitation and level of education.

## 104 Methods

105 The Ural Eye and Medical Study (UEMS) is a population-based investigation. It was performed in the  
106 Russian Republic of Bashkortostan, in its capital Ufa (region Kirovskii) and in a rural region consisting  
107 of villages in the Karmaskalinsky District. The latter was located in a distance of 65 km from Ufa.<sup>12-14</sup>  
108 The Ethics Committee of the Academic Council of the Ufa Eye Research Institute approved the study  
109 and informed written consent was obtained from all participants. Inclusion criteria were living in the  
110 study regions and an age of 40+ years. Assuming a participation rate of approximately 80% and  
111 aiming at a study population size of about 5500 to 6000 participants, the number of eligible individuals  
112 was calculated to be approximately 7000 to 7500 individuals. The number of 5500 to 6000 study  
113 participants was based on the experience gained in previous population-based investigations the  
114 study populations of which were assumed to have a similar prevalence of major diseases as the  
115 present study population.

116 The first part of the series of examinations was a standardized interview. It was conducted by  
117 trained social workers and it consisted of more than 250 standardized questions on parameters of  
118 various fields, such as socioeconomics, diet, alcohol and tobacco consumption, physical exercise and  
119 medical history.<sup>12,13,15</sup> The Guidelines for Accurate and Transparent Health Estimates Reporting  
120 (GATHER statement guidelines) were applied in reporting the data.<sup>16</sup>

121 As described in detail recently, the series of examination further consisted of measurements of  
122 arterial blood pressure, pulse rate and body height and weight, handgrip strength (as measured by  
123 dynamometry), blood concentrations of glucose, blood lipids and other substances, and pulmonary  
124 function (spirometry).<sup>12,13</sup> Arterial hypertension was defined by a systolic blood pressure  $\geq 140$  mmHg  
125 and/or diastolic blood pressure  $\geq 90$  mmHg, and/or self-reported history or current treatment of arterial  
126 hypertension with antihypertensive medication. Diabetes mellitus was defined by a blood glucose

127 concentration  $\geq 7.0$  mmol/L or a self-reported history of physician diagnosis or of therapy of diabetes  
128 mellitus.

129 Hearing loss was assessed by a series of 11 standardized questions ten of which were  
130 derived from the "Hearing Handicap Inventory for the Elderly Screening Version (HHIE-S)" (Table 1).<sup>17-</sup>  
131 <sup>19</sup> The questions could be answered by "no" (0 points), "sometimes" (2 points) and "yes (4 points).  
132 The total hearing loss score was the sum of all points and could range between 0 points and 44  
133 points. The amount of hearing loss was assessed by the hearing loss score. The HHIE-S had been  
134 applied in previous investigations.<sup>17-19</sup> The diagnostic performance of the HHIE-S against five  
135 definitions of hearing loss as assessed by pure-tone audiometry had assessed in a previous  
136 investigation on 178 elderly subjects.<sup>20</sup> The HHIE-S had sensitivities ranging from 53 to 72% and  
137 specificities ranging from 70 to 84% with the different definitions. The receiver-operating  
138 characteristics and the likelihood ratios of the HHIE-S were similar regardless of the hearing loss  
139 definitions. Another investigation had examined the reliability, validity, and associations of the HHIE-S  
140 with quality of life measures such as the subjective well-being, depressive symptoms, subjective  
141 loneliness, and physical functioning.<sup>21</sup> It revealed that the reliability of the HHIE-S was relatively high  
142 with a Cronbach's alpha coefficient of 0.91, a Spearman-Brown coefficient of 0.90 and an intra-class  
143 correlation coefficient of 0.85. The prevalence of self-reported hearing loss as a binary variable was  
144 assessed by the single question "Do you experience a hearing loss?". We additionally carried out  
145 Weber's test and Rinne's test.

146 Applying a statistical software program (Statistical Package for Social Science, SPSS, version  
147 25.0; IBM-SPSS Inc., Chicago, USA), we first calculated the prevalence of hearing loss, and then  
148 assessed its associations with other parameters in a univariate analysis. Finally, we performed a  
149 multivariable regression analysis with the hearing loss score as dependent variable. The list of  
150 independent variables included all those variables which were associated ( $P \leq 0.10$ ) with the hearing  
151 loss score in the univariate analysis. Multicollinearity was also tested. The prevalence of hearing loss  
152 as analyzed in a binary regression analysis. We assessed the odds ratios (OR) and their 95%  
153 confidence intervals (CI). The level of statistical significance for the  $P$ -values was set as  $< 0.05$ .

#### 154 Patient and Public Involvement

155 Patients were not involved in the study.

156

#### 157 Results

158  
159 Out of a total population of 7328 eligible individuals, 5899 (80.5%) individuals participated in the Ural  
160 Eye and Medical Study. Out of these, information on the hearing loss score was available for 5397  
161 (91.5%) individuals (2450 (45.4%) men). Their mean age was  $58.6 \pm 10.6$  years (range: 40-94 years).  
162 The study population did not differ markedly in its age and sex composition from the Russian  
163 population as published in the census of 2010.<sup>22</sup>

164 The subjects with information on hearing loss as compared with the individuals without hearing  
165 loss data had a significantly lower age ( $P < 0.001$ ) and were significantly more often men ( $P < 0.001$ ).  
166 The mean hearing loss score was  $5.13 \pm 10.95$  (median: 0; range: 0 – 44). Within the group of  
167 ethnically Russians ( $n=1185$ ; age:  $60.1 \pm 11.1$  years), the mean hearing loss score was  $5.58 \pm 11.09$

(median: 0; range: 0 – 44), with no significant ( $P=0.11$ ) difference to the non-Russian group. An abnormal result of Weber's test was found for 210 (3.9%; 95%CI: 3.4, 4.4) study participants and an abnormal result for Rinné test for 3390 (63.0%; 95%CI: 61.7, 64.3) individuals. The hearing loss score differed significantly between individuals with a positive Weber's test and individuals with a negative Weber's test ( $23.9 \pm 14.7$  vs.  $4.4 \pm 10.1$ ;  $P<0.001$ ).

In univariate analysis, a higher hearing loss score was correlated with parameters such as older age ( $P<0.001$ ) (Table 2) (Fig. 1), male gender ( $P<0.001$ ) (Fig. 1) and other variables (Supplementary Table 1). The multivariable regression analysis included the hearing loss score as dependent variable and as independent variables all those parameters which were associated ( $P\leq 0.10$ ) with the hearing loss score in the univariate analysis. Due to collinearity, we first dropped the parameters of body weight (variance inflation factor (VIF): 6.8) and waist circumference (VIF: 4.0). We then dropped step by step those parameters, such as the prevalence of arterial hypertension, which were no longer statistically significantly associated with hearing loss in the multivariate analysis. In the resulting final model, a higher hearing loss score was associated (regression coefficient  $r$ : 0.33) with older age ( $P<0.001$ ), male gender ( $P<0.001$ ), a higher depression score ( $P<0.001$ ), a higher prevalence of headache ( $P<0.001$ ) and a higher prevalence of history of cancer ( $P=0.008$ ), cardiovascular disease including stroke ( $P=0.003$ ), osteoarthritis ( $P=0.006$ ) and skin disease ( $P=0.01$ ), a lower number of days with intake of fruits ( $P=0.02$ ), and a higher amount of physically vigorous activity during work ( $P=0.008$ ) and of physically moderate activity during leisure time ( $P<0.001$ ) (Table 3).

Hearing loss defined as a binary variable (question "Do you experience a hearing loss?") was prevalent in 1406 (26.1%; 95%CI: 24.2, 27.2) participants. It was significantly associated with a positive Weber's test (OR: 24.0; 95%CI: 15.7, 36.7). The prevalence of hearing loss increased with older age ( $P<0.001$ ; OR: 1.06; 95%CI: 1.05, 1.07) (Table 4). In the age group between 60 and <80 years, the prevalence of hearing loss was significantly ( $P=0.003$ ) higher for men than for women (38.93% (95%CI: 35.8, 42.1) vs. 32.8% (95%CI: 30.2, 35.3)). For the age group of less than 60 years ( $P=0.57$ ) and for the age group of 80+ years ( $P=0.87$ ), both genders did not differ significantly in the prevalence of hearing loss (Fig. 2). In the total study population, the prevalence of hearing loss increased from 10.9% (95%CI: 8.0, 13.7) in the age group of 40 to <45 years, to 22.7% (95%CI: 20.0, 25.4) in the age group of 55 to <60 years, and to 59.0% (95%CI: 51.6, 66.4) in the age group of 80+ years (Fig. 2).

In a multivariable binary regression analysis, higher prevalence of hearing loss was associated with older age ( $P<0.001$ ), male gender ( $P<0.001$ ), a higher depression score ( $P<0.001$ ), a higher prevalence of headache ( $P=0.001$ ) and a higher prevalence of history of cancer ( $P=0.04$ ), cardiovascular disease including stroke ( $P=0.001$ ) and osteoarthritis ( $P<0.001$ ), a higher amount of physically vigorous activity during work ( $P<0.001$ ), higher prevalence of alcohol consumption ( $P<0.001$ ) and of dry eye feeling ( $P<0.001$ ) (Table 5). Prevalence of hearing loss was marginally correlated with a higher anxiety score, when added to the model ( $P=0.07$ ; OR: 1.03; 95%CI: 0.998, 1.06). If diabetes ( $P=0.52$ ), arterial hypertension ( $P=0.20$ ), level of education ( $P=0.11$ ; OR: 0.97; 95%CI: 0.93, 1.01), urban versus rural region of habitation ( $P=0.70$ ), blood concentration of high-density lipoproteins ( $P=0.17$ ) and low-density lipoproteins ( $P=0.52$ ), current smoking ( $P=0.95$ ) and

209 smoking package years ( $P=0.37$ ), and best corrected visual acuity ( $P=0.93$ ) and presenting visual  
210 acuity ( $P=0.62$ ) and anxiety score ( $P=0.07$ ; OR: 1.03; 95%CI: 0.998, 1.06) were added to the model,  
211 these variables were not significantly associated with hearing loss.

212

213

## 214 Discussion

215 In this Russian population, the prevalence of hearing loss increased from 10.9% in the 40 to 45 year-  
216 olds to 59.0% in the 80+ years-olds. It was associated with older age, male gender, a higher  
217 depression score and a higher prevalence of headache, history of cardiovascular disease including  
218 stroke, osteoarthritis, physically vigorous activity during work, alcohol consumption and dry eye  
219 feeling. It was marginally significantly correlated with a higher anxiety score ( $P=0.07$ ).

220 The findings obtained in our study on a population in Russia can be compared with  
221 observations made in previous investigations conducted in other world regions. The high overall  
222 prevalence of hearing loss of 26.1% (95%CI: 24.2, 27.2) in our study population aged 40+ years  
223 agreed well with the data of the World Health Organization WHO that over 5% of the total world's  
224 population – or 466 million people – has disabling hearing loss (432 million adults and 34 million  
225 children).<sup>23</sup> The prevalence of hearing loss as found in our study population also well with figures  
226 found by Ikeda and colleagues for the United States, and with other data reported for the United  
227 States by the Health, Aging and Body Composition Study after adjusting for age differences in the  
228 study populations.<sup>24,25</sup> The prevalence of hearing loss in our study population was lower than the  
229 figures found by Hannula and associates for Northern Finland (prevalence of self-reported hearing  
230 problems of 37.1% and of 43.3% for difficulties in following a conversation in noise),<sup>26</sup> and it was lower  
231 than the prevalence of unilateral and bilateral speech-frequency hearing impairment in the National  
232 Health and Nutrition Examination Survey for the United States.<sup>27-29</sup>

233 In all the previous studies as in our investigation, the prevalence of hearing loss strongly  
234 increased with older age for both genders (Fig. 1, 2).<sup>27,30-46</sup> In our study population, the age-related  
235 increase in the prevalence of hearing loss was less marked for women than for men in the age group  
236 of 60 to <80 years (Fig. 1, 2). As in the previous studies on other ethnicities, the frequency of hearing  
237 loss was higher for men than for women.<sup>27,29-46</sup> In our study, the gender difference hold true for the  
238 age group of 60 to <80 years (38.93%;95%CI:35.8,42.1 vs. 32.8%;95%CI:30.2,35.3; $P=0.003$ ). In the  
239 age group between 60 and <80 years, the prevalence of hearing loss was significantly ( $P=0.003$ )  
240 higher for men than for women (38.93% (95%CI: 35.8, 42.1) vs. 32.8% (95%CI: 30.2, 35.3). For the  
241 age group of less than 60 years ( $P=0.57$ ) and for the age group of 80+ years ( $P=0.87$ ), both genders  
242 did not differ significantly in the prevalence of hearing loss.

243 In our study, a higher prevalence of hearing loss was associated with a higher prevalence of  
244 vigorous physical activity during work. It was in contrast to the finding reported by Gispén and  
245 coworkers who used data of the National Health and Nutritional Examination Survey (2005-06) and  
246 who found that individuals with moderate or greater hearing impairment had greater odds than those  
247 with normal hearing of being in a lower category of physical activity.<sup>39</sup> The association between  
248 vigorous physical activity at work and higher prevalence of hearing loss in our study might have been  
249 due to a potentially confounding correlation between heavy work and higher noise level at work.

1  
2  
3 250 In the National Health and Nutrition Examination Survey and in a study by Sommer et al.  
4 251 hearing impairment was more prevalent among adults with diabetes in a multivariable analysis.<sup>9</sup> It is  
5 252 in contrast to our study in which neither diabetes nor blood concentrations of glucose were  
6 253 significantly correlated with hearing loss (Supplementary Table 1). As a corollary, the hearing loss in  
7 254 our study was not significantly correlated with the body mass index (Supplementary Table 1). It is in  
8 255 partial contrast to the results of the study by Lalwani and colleagues who found that in children of 12 to  
9 256 19 years of age, obese adolescents as compared adolescents with normal body weight had elevated  
10 257 pure tone hearing thresholds and greater prevalence of unilateral low-frequency sensorineural hearing  
11 258 loss ( $P=0.01$ ).<sup>37</sup>

12 259 A higher prevalence of self-reported hearing impairment was associated with a higher  
13 260 depression score in our study as well as in the study by Li and colleagues who used data of the  
14 261 National Health and Nutrition Examination Survey (NHANES), 2005-2010. They found that that self-  
15 262 reported hearing impairment and audiometrically determined hearing loss were significantly  
16 263 associated with depression, particularly in women.<sup>38</sup>

17 264 The association between hearing loss and cardiovascular risk factors has remained unclear so  
18 265 far. While in our study population and in a study by Lohi et al. cardiovascular risk factors were not  
19 266 significantly associated with hearing loss, the National Health and Nutrition Examination Survey and  
20 267 the Health, Aging and Body Composition Study reported that cardiovascular risk generated by  
21 268 smoking and diabetes was associated with both high- and low-frequency hearing loss.<sup>26,29,30,35,41</sup>  
22 269 Reasons for the discrepancy between the studies may have been differences in the study population  
23 270 (lifestyle in Russia versus lifestyle in the US or in Korea), differences in the multivariable analysis and  
24 271 others.

25 272 Limitations of our study should be discussed. First, the main outcome parameter was self-  
26 273 reported hearing loss assessed in a series of 11 standardized questions. In previous studies,  
27 274 audiometry was applied to quantify the hearing impairment. Although the latter method is a more  
28 275 quantitative one, the degree of self-reported hearing impairment as compared to audiometrically  
29 276 defined hearing loss may be more important to reflect the quality of the daily life of the individual.  
30 277 Interestingly, a study by Hannula et al. showed that self-reported hearing difficulties were more  
31 278 frequent than hearing impairment defined by audiometric measurement.<sup>26</sup> Hannula also reported that  
32 279 self-reported hearing difficulties predicted hearing impairment at high frequencies (4-8 kHz) rather  
33 280 than at frequencies of 0.5-4 kHz, which were commonly used to define the degree of hearing  
34 281 impairment in medical and legal issues. The test-retest reliability of the Hearing Handicap Inventory  
35 282 for Adults was evaluated in a study showing a correlation coefficient of  $r^2=0.94$ .<sup>47</sup> In another  
36 283 investigation, the HHIE-S showed a significant reduction in perceived emotional and social/situational  
37 284 effects of hearing impairment following the use of hearing aids.<sup>48</sup> Second, although noise is a major  
38 285 determinant of hearing loss along with aging, the exposure to noise at the working place was not  
39 286 specifically assessed in the study. This lack of data on noise exposure was therefore one of the  
40 287 limitations of the study. The amount of physical activity at the working place however was evaluated  
41 288 and in the multivariable model, a higher hearing loss score was associated with a higher amount of  
42 289 physically vigorous activity during work ( $P=0.008$ ) (Table 3). Although the amount of physical activity  
43 290 at the working place is not a direct measure for the noise exposure, both parameters are correlated

1  
2  
3 291 with each other so that a higher amount of physically vigorous activity during work may be a surrogate  
4 292 for an increased noise exposure.

5  
6 293 In conclusion, in our typically ethnically mixed, urban and rural, Russian population aged 40+  
7 294 years, the mean prevalence of hearing loss was 26.1% and increased from 10.9% in the 40 to 45  
8 295 year-olds to 59.0% in the 80+ years-olds. In addition to older age, the prevalence of hearing loss was  
9 296 associated with male gender, depression and a higher prevalence of headache, history of  
10 297 cardiovascular disease including stroke, physically vigorous activity during work, alcohol consumption  
11 298 and dry eye feeling, and marginally significantly correlated with a higher anxiety score. These data  
12 299 may be useful to assess the epidemiology of hearing loss in Russia and to assess factors associated  
13 300 with hearing impairment in Russia.  
14  
15  
16  
17  
18  
19  
20  
21  
22  
23  
24  
25  
26  
27  
28  
29  
30  
31  
32  
33  
34  
35  
36  
37  
38  
39  
40  
41  
42  
43  
44  
45  
46  
47  
48  
49  
50  
51  
52  
53  
54  
55  
56  
57  
58  
59  
60

**References**

1. GBD 2016 DALYs and HALE Collaborators. Global, regional, and national disability-adjusted life-years (DALYs) for 333 diseases and injuries and healthy life expectancy (HALE) for 195 countries and territories, 1990-2016: a systematic analysis for the Global Burden of Disease Study 2016. *Lancet*. 2017;390:1260-1344.
2. Cruickshanks KJ, Dhar S, Dinces E, Fifer RC, Gonzalez F, II, Heiss G, et al. Cigarette smoking and hearing loss: the epidemiology of hearing loss study. *JAMA*. 1998;279:1715-1719.
3. Vilayur E, Gopinath B, Harris DC, Burlutsky G, McMahon CM, Mitchell P. The association between reduced GFR and hearing loss: a cross-sectional population-based study. *Am J Kidney Dis*. 2010;56:661-669.
4. Béria JU, Raymann BC, Gigante LP, Figueiredo AC, Jotz G, Roithman R, et al. Hearing impairment and socioeconomic factors: a population-based survey of an urban locality in southern Brazil. *Rev Panam Salud Publica*. 2007;21:381-387.
5. Klein BE, Cruickshanks KJ, Nondahl DM, Klein R, Dalton DS. Cataract and hearing loss in a population-based study: the Beaver Dam studies. *Am J Ophthalmol*. 2001;132:537-543.
6. Raynor LA, Pankow JS, Miller MB, Huang GH, Dalton D, Klein R, et al. Familial aggregation of age-related hearing loss in an epidemiological study of older adults. *Am J Audiol*. 2009;18:114-118.
7. Gurgel RK, Ward PD, Schwartz S, Norton MC, Foster NL, Tschanz JT. Relationship of hearing loss and dementia: a prospective, population-based study. *Otol Neurotol*. 2014;35:775-781.
8. Su P, Hsu CC, Lin HC, Huang WS, Yang TL, Hsu WT, et al. Age-related hearing loss and dementia: a 10-year national population-based study. *Eur Arch Otorhinolaryngol*. 2017;274:2327-2334.
9. Sommer J, Brenann-Jones CG, Eikelboom RH, Hunter M, Davis WA, Atlas MD, et al. A population-based study of the association between dysglycaemia and hearing loss in middle age. *Diabet Med*. 2017;34:683-690.
10. Asghari A, Farhadi M, Daneshi A, Khabazkhoob M, Mohazzab-Torabi S, Jalessi M, et al. The prevalence of hearing impairment by age and gender in a population-based study. *Iran J Public Health*. 2017; 46:1237-1246.
11. Smith AK, Ritchie CS, Miao Y, Boscardin WJ, Wallhagen ML. Self-reported hearing in the last 2 years of life in older adults. *J Am Geriatr Soc*. 2016;64:1486-1491.
12. Bikbov M, Fayzrakhmanov RR, Kazakbaeva G, Jonas JB. Ural Eye and Medical Study: description of study design and methodology. *Ophthalmic Epidemiol*. 2018;25:187-198.
13. Bikbov MM, Fayzrakhmanov RR, Kazakbaeva GM, Zainullin RM, Salavatova VF, Gilmanshin TR, et al. Frequency and Associated Factors of Bone Fractures in Russians: The Ural Eye and Medical Study. *Sci Rep*. 2018;8:7483.
14. Wikipedia. Bashkortostan. <https://en.wikipedia.org/wiki/Bashkortostan>; assessed 4.3.2018
15. Folstein MF, Folstein SE, McHugh PR "Mini-mental state". A practical method for grading the cognitive state of patients for the clinician. *J Psychiatr Res*. 1975;12:189-198.
16. Stevens GA, Alkema L, Black RE, Boerma JT, Collins GS, Ezzati M, et al. Guidelines for Accurate and Transparent Health Estimates Reporting: the GATHER statement. *Lancet*. 2016;388: e19-23.
17. Aiello CP, Lima II, Ferrari DV. Validity and reliability of the hearing handicap inventory for adults. *Braz J Otorhinolaryngol*. 2011;77:432-438.



- 1  
2  
3 343 18. Souza VC, Lemos SM. Tools for evaluation of restriction on auditory participation: systematic  
4 344 review of the literature. *Codas*. 2015;27:400-406.
- 5  
6 345 19. Bae S, Lee S, Lee S, Harada K, Makizako H, Park H, et al. Combined effect of self-reported  
7 346 hearing problems and level of social activities on the risk of disability in Japanese older adults: A  
8 347 population-based longitudinal study. *Maturitas*. 2018;115:51-55.
- 9  
10 348 20. Lichtenstein MJ, Bess FH, Logan SA. Diagnostic performance of the hearing handicap inventory  
11 349 for the elderly (screening version) against differing definitions of hearing loss. *Ear Hear* 1988;9:208-  
12 350 211.
- 13  
14 351 21. Tomioka K, Ikeda H, Hanaie K, Morikawa M, Iwamoto J, Okamoto N, et al. The Hearing Handicap  
15 352 Inventory for Elderly-Screening (HHIE-S) versus a single question: reliability, validity, and relations  
16 353 with quality of life measures in the elderly community, Japan. *Qual Life Res* 2013;22:1151-1159.
- 17  
18 354 22. [https://en.wikipedia.org/wiki/Demographics\\_of\\_Russia](https://en.wikipedia.org/wiki/Demographics_of_Russia). Assessed 5.11.2017
- 19  
20 355 23. WHO. Deafness and hearing loss. Fact sheet. Updated March 2018.  
21 356 <http://www.who.int/mediacentre/factsheets/fs300/en/>; assessed 18.3.2018,
- 22  
23 357 24. Ikeda N, Murray CJ, Salomon JA. Tracking population health based on self-reported impairments:  
24 358 Trends in the prevalence of hearing loss in US adults, 1976-2006. *Am J Epidemiol*. 2009;170:80-87.
- 25  
26 359 25. Helzner EP, Cauley JA, Pratt SR, Wisniewski SR, Zmuda JM, Talbott EO, et al. Race and sex  
27 360 differences in age-related hearing loss: the Health, Aging and Body Composition Study. *J Am Geriatr*  
28 361 *Soc*. 2005;53:2119-2127.
- 29  
30 362 26. Hannula S, Bloigu R, Majamaa K, Sorri M, Mäki-Torkko E. Self-reported hearing problems among  
31 363 older adults: prevalence and comparison to measured hearing impairment. *J Am Acad Audiol*.  
32 364 2011;22:550-559.
- 33  
34 365 27. Hoffman HJ, Dobie RA, Losonczy KG, Themann CL, Flamme GA. Declining prevalence of hearing  
35 366 loss in US adults aged 20 to 69 years. *JAMA Otolaryngol Head Neck Surg*. 2017;143:274-285.
- 36  
37 367 28. Ciletti L, Flamme GA. Prevalence of hearing impairment by gender and audiometric configuration:  
38 368 results from the National Health and Nutrition Examination Survey (1999-2004) and the Keokuk  
39 369 County Rural Health Study (1994-1998). *J Am Acad Audiol*. 2008;19:672-685.
- 40  
41 370 29. Agrawal Y, Platz EA, Niparko JK. Prevalence of hearing loss and differences by demographic  
42 371 characteristics among US adults: data from the National Health and Nutrition Examination Survey,  
43 372 1999-2004. *Arch Intern Med*. 2008;168:1522-1530.
- 44  
45 373 30. Cruickshanks KJ, Dhar S, Dinces E, Fifer RC, Gonzalez F 2nd, Heiss G, et al. Hearing impairment  
46 374 prevalence and associated risk factors in the Hispanic Community Health Study/Study of Latinos.  
47 375 *JAMA Otolaryngol Head Neck Surg*. 2015;141:641-648.
- 48  
49 376 31. Agrawal Y, Platz EA, Niparko JK. Risk factors for hearing loss in US adults: data from the National  
50 377 Health and Nutrition Examination Survey, 1999 to 2002. *Otol Neurotol*. 2009;30:139-145.
- 51  
52 378 32. Shargorodsky J, Curhan SG, Curhan GC, Eavey R. Change in prevalence of hearing loss in US  
53 379 adolescents. *JAMA*. 2010;304:772-778.
- 54  
55 380 33. Lin FR, Thorpe R, Gordon-Salant S, Ferrucci L. Hearing loss prevalence and risk factors among  
56 381 older adults in the United States. *J Gerontol A Biol Sci Med Sci*. 2011;66:582-590.
- 57  
58 382 34. Lin FR, Niparko JK, Ferrucci L. Hearing loss prevalence in the United States. *Arch Intern Med*.  
59 383 2011;171:1851-1852.

- 1  
2  
3 384 35. Bainbridge KE, Hoffman HJ, Cowie CC. Risk factors for hearing impairment among U.S. adults  
4 385 with diabetes: National Health and Nutrition Examination Survey 1999-2004. *Diabetes Care*.  
5 386 2011;34:1540-1545.
- 7 387 36. Lin FR, Maas P, Chien W, Carey JP, Ferrucci L, Thorpe R. Association of skin color, race/ethnicity,  
8 388 and hearing loss among adults in the USA. *J Assoc Res Otolaryngol*. 2012;13:109-117.
- 10 389 37. Lalwani AK, Katz K, Liu YH, Kim S, Weitzman M. Obesity is associated with sensorineural hearing  
11 390 loss in adolescents. *Laryngoscope*. 2013;123:3178-3184.
- 13 391 38. Li CM, Zhang X, Hoffman HJ, Cotch MF, Themann CL, Wilson MR. Hearing impairment  
14 392 associated with depression in US adults, National Health and Nutrition Examination Survey 2005-  
15 393 2010. *JAMA Otolaryngol Head Neck Surg*. 2014;140:293-302.
- 17 394 39. Gispén FE, Chen DS, Genther DJ, Lin FR. Association between hearing impairment and lower  
18 395 levels of physical activity in older adults. *J Am Geriatr Soc*. 2014;62:1427-1433.
- 20 396 40. Jun HJ, Hwang SY, Lee SH, Lee JE, Song JJ, Chae S. The prevalence of hearing loss in South  
21 397 Korea: data from a population-based study. *Laryngoscope*. 2015;125:690-694.
- 23 398 41. Lohi V, Hannula S, Ohtonen P, Sorri M, Mäki-Torkko E. Hearing impairment among adults: the  
24 399 impact of cardiovascular diseases and cardiovascular risk factors. *Int J Audiol*. 2015;54:265-273.
- 26 400 42. Hong JW, Jeon JH, Ku CR, Noh JH, Yoo HJ, Kim DJ. The prevalence and factors associated with  
27 401 hearing impairment in the Korean adults: the 2010-2012 Korea National Health and Nutrition  
28 402 Examination Survey (observational study). *Medicine (Baltimore)*. 2015;94:e611.
- 30 403 43. Chang J, Ryou N, Jun HJ, Hwang SY, Song JJ, Chae SW. Effect of cigarette smoking and passive  
31 404 smoking on hearing impairment: data from a population-based study. *PLoS One*. 2016;11:e0146608.
- 33 405 44. Park YH, Shin SH, Byun SW, Kim JY. Age- and Gender-Related Mean Hearing Threshold in a  
34 406 Highly-Screened Population: The Korean National Health and Nutrition Examination Survey 2010-  
35 407 2012. *PLoS One*. 2016;11:e0150783.
- 37 408 46. Su BM, Chan DK. Prevalence of Hearing Loss in US Children and Adolescents: Findings from  
38 409 NHANES 1988-2010. *JAMA Otolaryngol Head Neck Surg*. 2017;143:920-927.
- 40 410 46. Bainbridge KE, Hoffman HJ, Cowie CC. Diabetes and hearing impairment in the United States:  
41 411 audiometric evidence from the National Health and Nutrition Examination Survey, 1999 to 2004. *Ann  
42 412 Intern Med*. 2008;149:1-10.
- 44 413 47. Newman CW, Weinstein BE, Jacobson GP, Hug GA. Test-retest reliability of the hearing handicap  
45 414 inventory for adults. *Ear Hear*. 1991;12:355-357.
- 47 415 48. Newman CW, Jacobson GP, Hug GA, Weinstein BE, Malinoff RL. Practical method for quantifying  
48 416 hearing aid benefit in older adults. *J Am Acad Audiol*. 1991;2:70-75.
- 50  
51  
52  
53  
54  
55  
56  
57  
58  
59  
60

418 **Tables**

## 419 Table 1

420 Standardized questions to assess the presence and sequels of hearing problems

421 1. Do you experience a hearing loss?

422 2. Does a hearing problem make you feel embarrassed when meeting new people?

423 3. Does a hearing problem make you feel frustrated when talking to members of your family?

424 4. Do you have difficulties hearing when someone speaks in a whisper?

425 5. Do you feel handicapped by a hearing problem?

426 6. Does a hearing problem cause you difficulties when visiting friends, relatives, or neighbors?

427 7. Does a hearing problem make you attending religious services less often than you would like?

428 8. Does a hearing problem make you having arguments with family members?

429 9. Does a hearing problem cause you difficulties when listening to TV or radio?

430 10. Do you feel that any difficulty with your hearing limits or does it hamper your personal or social  
431 life?432 11. Does a hearing problem cause you difficulty when you are in a restaurant together with relatives or  
433 friends?

435 Table 2

436 Mean hearing loss score in the Ural Eye and Medical Study, stratified by sex and age

437

| Age Group (Years) | n   | Hearing Loss Score | 95% Confidence Intervals |
|-------------------|-----|--------------------|--------------------------|
| Men               |     |                    |                          |
| 40-44             | 209 | 2.1 ± 7.4          | 1.0, 3.1                 |
| 45-49             | 350 | 1.9 ± 6.9          | 1.2, 2.7                 |
| 50-54             | 422 | 2.9 ± 8.4          | 2.1, 3.7                 |
| 55-59             | 471 | 4.7 ± 10.6         | 3.7, 5.6                 |
| 60-64             | 383 | 7.6 ± 13.2         | 6.3, 8.9                 |
| 65-69             | 273 | 8.5 ± 13.4         | 6.9, 10.1                |
| 70-74             | 124 | 8.5 ± 13.1         | 6.1, 10.8                |
| 75-79             | 150 | 10.9 ± 14.7        | 8.5, 13.3                |
| 80+               | 68  | 15.9 ± 16.2        | 12.0, 19.8               |
| Women             |     |                    |                          |
| 40-44             | 252 | 1.2 ± 4.4          | 0.7, 1.8                 |
| 45-49             | 361 | 2.2 ± 7.1          | 1.4, 2.9                 |
| 50-54             | 465 | 3.1 ± 8.7          | 2.3, 3.9                 |
| 55-59             | 500 | 4.1 ± 9.6          | 3.3, 5.0                 |
| 60-64             | 449 | 4.8 ± 10.0         | 3.9, 5.7                 |
| 65-69             | 430 | 5.8 ± 11.3         | 4.7, 6.8                 |
| 70-74             | 182 | 6.2 ± 10.9         | 4.6, 7.8                 |
| 75-79             | 203 | 10.8 ± 14.8        | 8.7, 12.8                |
| 80+               | 105 | 15.3 ± 15.6        | 12.2, 18.3               |

441 Table 3  
 442 Associations (multivariate analysis) between the hearing loss score and other systemic parameters in  
 443 the Ural Eye and Medical Study  
 444  
 445  
 446

| Parameters                                                                                                                                                                                                        | P-Value | Standardized Regression Coefficient beta | Non-Standardized Regression Coefficient B | 95% Confidence Interval | Variance Inflation Factor |
|-------------------------------------------------------------------------------------------------------------------------------------------------------------------------------------------------------------------|---------|------------------------------------------|-------------------------------------------|-------------------------|---------------------------|
| Age (Years)                                                                                                                                                                                                       | <0.001  | 0.23                                     | 0.27                                      | 0.23, 0.31              | 1.14                      |
| Sex (Women / Men)                                                                                                                                                                                                 | <0.001  | 0.07                                     | 1.69                                      | 0.89, 2.50              | 1.13                      |
| Depression Score                                                                                                                                                                                                  | <0.001  | 0.07                                     | 0.22                                      | 0.11, 0.33              | 1.11                      |
| History of Headache                                                                                                                                                                                               | <0.001  | 0.07                                     | 1.50                                      | 0.71, 2.29              | 1.09                      |
| History of Cancer                                                                                                                                                                                                 | 0.008   | 0.05                                     | 3.53                                      | 0.91, 6.16              | 1.01                      |
| History of Cardiovascular Disease Including Stroke                                                                                                                                                                | 0.003   | 0.05                                     | 1.45                                      | 0.51, 2.39              | 1.11                      |
| History of Osteoarthritis                                                                                                                                                                                         | 0.006   | 0.05                                     | 1.43                                      | 0.42, 2.44              | 1.06                      |
| History of Skin Disease                                                                                                                                                                                           | 0.01    | 0.04                                     | 2.18                                      | 0.48, 3.89              | 1.01                      |
| In a week how many days do you eat fruits?                                                                                                                                                                        | 0.02    | -0.04                                    | -0.24                                     | -0.44, -0.04            | 1.03                      |
| „Does your work involve physically vigorous activity (like heavy lifting or digging) or moderately intensive activity (like brisk walking or carrying light loads during work for at least 10 minutes at a time?“ | 0.042   | 0.04                                     | 1.13                                      | 0.04, 2.22              | 1.04                      |
| „How many days a week do you do such physically vigorous activity during work?“                                                                                                                                   | 0.008   | 0.05                                     | 0.36                                      | 0.10, 0.63              | 1.10                      |
| „In your leisure time, do you do any moderate intensity activities like brisk walking, cycling or swimming for at least 10 minutes at a time?“                                                                    | <0.001  | 0.09                                     | 1.96                                      | 1.19, 2.74              | 1.03                      |

447

## 449 Table 4

450 Prevalence of self-reported hearing loss (definite answer of “Yes” (in contrast to the answer of  
 451 “Sometimes” or “No”) to the question “Do you experience a hearing loss?”) stratified by age and  
 452 gender in the Ural Eye and Medical Study

453

454

455

456

| Age Group (Years) | n   | Prevalence of Self-Reported Hearing Loss | 95% Confidence Intervals |
|-------------------|-----|------------------------------------------|--------------------------|
| Men               |     |                                          |                          |
| 40-44             | 209 | 10.1                                     | 5.9, 14.2                |
| 45-49             | 350 | 13.4                                     | 9.8, 17.0                |
| 50-54             | 422 | 17.5                                     | 13.9, 21.2               |
| 55-59             | 471 | 22.3                                     | 18.5, 26.1               |
| 60-64             | 383 | 32.3                                     | 27.7, 37.1               |
| 65-69             | 273 | 40.3                                     | 34.4, 46.2               |
| 70-74             | 124 | 41.1                                     | 32.3, 49.9               |
| 75-79             | 150 | 51.3                                     | 43.2, 59.4               |
| 80+               | 68  | 60.3                                     | 48.4, 72.2               |
| Women             |     |                                          |                          |
| 40-44             | 252 | 11.5                                     | 7.5, 15.5                |
| 45-49             | 361 | 14.7                                     | 11.0, 18.4               |
| 50-54             | 465 | 18.1                                     | 14.6, 21.6               |
| 55-59             | 500 | 23.0                                     | 19.3, 26.7               |
| 60-64             | 449 | 27.4                                     | 23.3, 31.5               |
| 65-69             | 430 | 31.9                                     | 27.4, 36.3               |
| 70-74             | 182 | 32.4                                     | 25.6, 39.3               |
| 75-79             | 203 | 46.8                                     | 39.9, 53.7               |
| 80+               | 105 | 58.1                                     | 48.5, 67.7               |

1  
2  
3 458 Table 5  
4 459 Associations (multivariate analysis) between the prevalence of hearing loss (definite answer of “Yes”  
5 460 (in contrast to the answer of “Sometimes” or “No”) to the question “Do you experience a hearing  
6 461 loss?”) and other systemic parameters in the Ural Eye and Medical Study  
7  
8  
9 462  
10 463

| Parameters                                                                                                                                                                                                        | <i>P</i> -Value | Odds Ratio | 95% Confidence Interval |
|-------------------------------------------------------------------------------------------------------------------------------------------------------------------------------------------------------------------|-----------------|------------|-------------------------|
| Age (Years)                                                                                                                                                                                                       | <0.001          | 1.06       | 1.06, 1.07              |
| Sex (Men / Women)                                                                                                                                                                                                 | <0.001          | 1.26       | 1.09, 1.47              |
| Depression Score                                                                                                                                                                                                  | <0.001          | 1.06       | 1.04, 1.08              |
| History of Headache                                                                                                                                                                                               | 0.001           | 1.27       | 1.10, 1.47              |
| History of Cancer                                                                                                                                                                                                 | 0.04            | 1.51       | 1.02, 2.24              |
| History of Cardiovascular Disease Including Stroke                                                                                                                                                                | 0.001           | 1.32       | 1.13, 1.55              |
| History of Osteoarthritis                                                                                                                                                                                         | <0.001          | 1.40       | 1.18, 1.67              |
| „Does your work involve physically vigorous activity (like heavy lifting or digging) or moderately intensive activity (like brisk walking or carrying light loads during work for at least 10 minutes at a time?“ | <0.001          | 1.40       | 1.21, 1.62              |
| Alcohol consumption                                                                                                                                                                                               | <0.001          | 1.51       | 1.28, 1.78              |
| Dry eye Feeling                                                                                                                                                                                                   | <0.001          | 1.67       | 1.30, 2.16              |

37 464

38 465

1  
2  
3  
4  
5  
6  
7  
8  
9  
10  
11  
12  
13  
14  
15  
16  
17  
18  
19  
20  
21  
22  
23  
24  
25  
26  
27  
28  
29  
30  
31  
32  
33  
34  
35  
36  
37  
38  
39  
40  
41  
42  
43  
44  
45  
46  
47  
48  
49  
50  
51  
52  
53  
54  
55  
56  
57  
58  
59  
60

467 Fig. 1  
468 Graph showing the distribution of the hearing loss score stratified by age and gender in the Ural Eye  
469 and Medical Study

470  
471 Fig. 2  
472 Graph showing the prevalence of self-reported hearing loss (defined by a definite answer of “Yes” (in  
473 contrast to the answer of “Sometimes” or “No”) to the question “Do you experience a hearing loss?”)  
474 stratified by age and gender in the Ural Eye and Medical Study

475  
476

For peer review only



1  
2  
3  
4  
5  
6  
7  
8  
9  
10  
11  
12  
13  
14  
15  
16  
17  
18  
19  
20  
21  
22  
23  
24  
25  
26  
27  
28  
29  
30  
31  
32  
33  
34  
35  
36  
37  
38  
39  
40  
41  
42  
43  
44  
45  
46  
47  
48  
49  
50  
51  
52  
53  
54  
55  
56  
57  
58  
59  
60

478  
479

For peer review only

1  
2  
3  
4  
5  
6  
7  
8  
9  
10  
11  
12  
13  
14  
15  
16  
17  
18  
19  
20  
21  
22  
23  
24  
25  
26  
27  
28  
29  
30  
31  
32  
33  
34  
35  
36  
37  
38  
39  
40  
41  
42  
43  
44  
45  
46  
47  
48  
49  
50  
51  
52  
53  
54  
55  
56  
57  
58  
59  
60

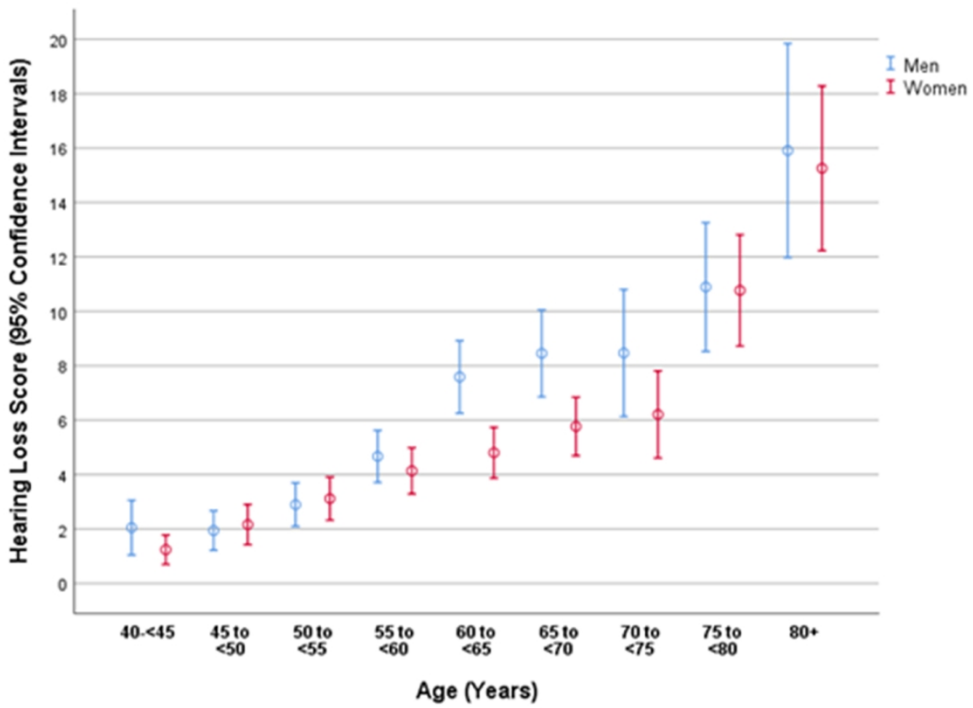

Fig. 1  
Graph showing the distribution of the hearing loss score stratified by age and gender in the Ural Eye and Medical Study

128x92mm (300 x 300 DPI)

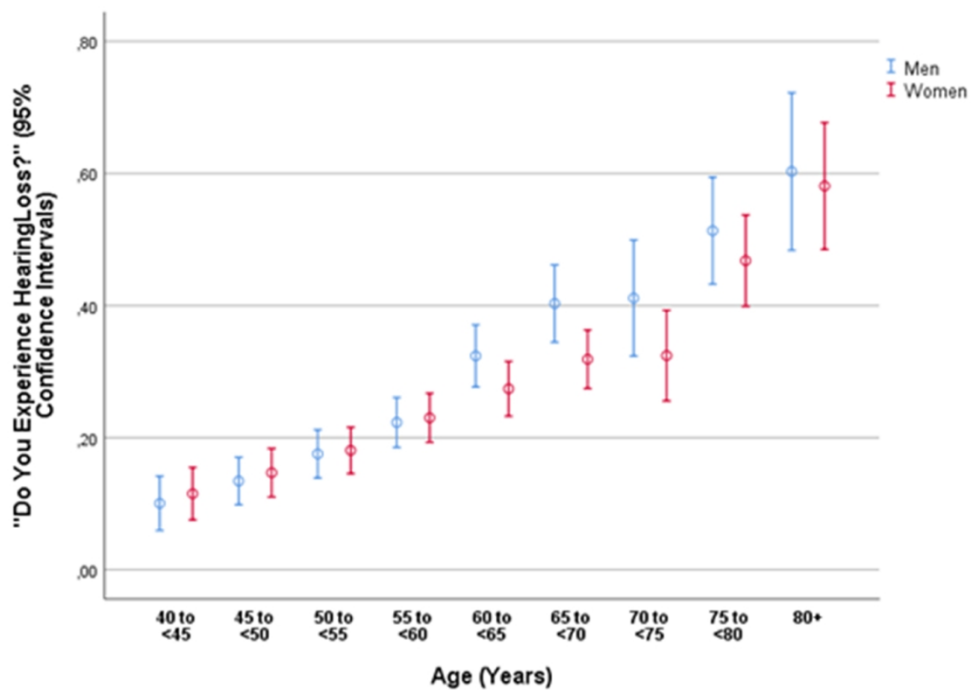

Fig. 2

Graph showing the prevalence of self-reported hearing loss (defined by a definite answer of "Yes" (in contrast to the answer of "Sometimes" or "No") to the question "Do you experience a hearing loss?") stratified by age and gender in the Ural Eye and Medical Study

125x87mm (300 x 300 DPI)

## 1 Supplementary Table 1

2 Associations between the hearing loss score and other systemic parameters after adjusting for age in  
 3 the Ural Eye and Medical Study

4

| Parameter                                                                                        | P-Value | Standardized Regression Coefficient beta | Non-Standardized Regression Coefficient B | 95% Confidence Interval of B |
|--------------------------------------------------------------------------------------------------|---------|------------------------------------------|-------------------------------------------|------------------------------|
| Gender: Women / Men                                                                              | <0.001  | 0.05                                     | 1.03                                      | 0.47, 1.60                   |
| Urban / rural region of habitation                                                               | 0.002   | 0.04                                     | 0.93                                      | 0.34, 1.52                   |
| Family status: Married versus any other status                                                   | 0.64    |                                          |                                           |                              |
| Family type: Joint (three generations) / nuclear (two generations) / single / family of 2 people | 0.02    | 0.03                                     | 0.29                                      | 0.04, 0.53                   |
| Ethnicity: Russian / any other ethnicity                                                         | 0.88    | 0.002                                    | 0.05                                      | -0.63, 0.74                  |
| Body height (cm)                                                                                 | 0.82    | 0.003                                    | 0.004                                     | -0.03, 0.04                  |
| Body weight (kg)                                                                                 | 0.03    | -0.03                                    | -0.02                                     | -0.04, -0.002                |
| Body mass index (kg/m <sup>2</sup> )                                                             | 0.01    | -0.03                                    | -0.07                                     | -0.13, -0.02                 |
| Waist circumference (cm)                                                                         | 0.02    | -0.03                                    | -0.03                                     | -0.05, -0.004                |
| Hip circumference (cm)                                                                           | 0.01    | -0.03                                    | -0.03                                     | -0.05, -0.006                |
| Waist-Hip-Ratio                                                                                  | 0.61    | -0.007                                   | -0.81                                     | -3.91, 2.29                  |
| Socioeconomic parameters                                                                         |         |                                          |                                           |                              |
| Level of education                                                                               | 0.49    | 0.009                                    | 0.06                                      | -0.11, 0.23                  |
| Monthly Income (Below poverty line / average / above average / high)                             | 0.99    | 0.000                                    | -0.01                                     | -0.58, 0.58                  |
| Own ownership of house (yes / no)                                                                | 0.90    | -0.002                                   | -0.09                                     | -1.51, 1.33                  |
| Own ownership of refrigerator (yes / no)                                                         | 0.19    | -0.03                                    | -2.98                                     | -7.40, 1.44                  |
| Own ownership of second house (yes / no)                                                         | 0.03    | -0.04                                    | -1.15                                     | -2.18, -0.12                 |
| Own ownership of telephone (yes / no)                                                            | 0.13    | -0.02                                    | -0.64                                     | -1.48, 0.19                  |
| Own ownership of smartphone (yes / no)                                                           | 0.87    | -0.003                                   | -0.07                                     | -0.91, 0.77                  |
| Own ownership of television set (yes / no)                                                       | 0.13    | -0.02                                    | -0.64                                     | -1.48, 0.19                  |
| Own ownership of car (yes / no)                                                                  | 0.07    | -0.03                                    | -0.82                                     | -1.72, 0.07                  |
| Own ownership of two-wheeler (yes / no)                                                          | 0.87    | -0.002                                   | -0.05                                     | -0.65, 0.56                  |
| Own ownership of tractor (yes / no)                                                              | 0.73    | 0.007                                    | 0.34                                      | -1.55, 2.23                  |

|                                                                                                                                                                                       |        |       |        |               |
|---------------------------------------------------------------------------------------------------------------------------------------------------------------------------------------|--------|-------|--------|---------------|
| Own ownership of bullock cart (yes / no)                                                                                                                                              | 0.76   | 0.006 | 0.32   | -1.71, 2.24   |
| Own ownership of computer / laptop (yes / no)                                                                                                                                         | 0.13   | -0.03 | -0.71  | -1.62, 0.21   |
| Physical activity                                                                                                                                                                     |        |       |        |               |
| How long is your usual work day? (Minutes)                                                                                                                                            | 0.17   | -0.02 | -0.001 | -0.002, 0.000 |
| Does your work involve mostly sitting or standing with less than 10 minutes of walking at a time? (Yes / No)                                                                          | 0.76   | 0.004 | 0.11   | -0.57, 0.78   |
| Does your work involve physically vigorous activity (like heavy lifting or digging) or physically moderate intensity activity (like brisk walking or carrying light loads) (Yes / No) | <0.001 | 0.07  | 1.59   | 0.97, 2.20    |
| How many days a week do you do such physically vigorous activity during work? (Yes / No)                                                                                              | 0.001  | 0.06  | 0.47   | 0.21, 0.73    |
| On a usual day how much time do you spend on such physically vigorous work during work? (Minutes)                                                                                     | <0.001 | 0.06  | 0.002  | 0.001, 0.004  |
| Does your work involve physically moderate-intensive activity, like brisk walking or carrying light loads for at least 10 minutes at a time?                                          | <0.001 | 0.06  | 1.32   | 0.66, 1.98    |
| Do you walk or use a bicycle (pedal cycle) for at least 10 minutes continuously to get to and from places?                                                                            | 0.63   | 0.006 | 0.25   | -0.77, 1.26   |
| In your leisure time, do you do any moderate intensity activities like brisk walking, cycling or swimming for at least 10 minutes at a time?                                          | <0.001 | 0.09  | 2.09   | 1.47, 2.72    |
| Over the past 7 days, how much time did you spend sitting or reclining on a typical day?                                                                                              | 0.40   | 0.01  | 0.000  | 0.000, 0.000  |
| History of diseases                                                                                                                                                                   |        |       |        |               |
| History of angina pectoris                                                                                                                                                            | 0.96   | 0.001 | 0.03   | -0.97, 1-.02  |
| History of asthma                                                                                                                                                                     | 0.03   | 0.03  | 1.95   | 0.20, 3.71    |
| History of arterial hypertension                                                                                                                                                      | 0.01   | 0.03  | 0.76   | 0.17, 1.36    |

|                                                       |        |        |        |              |
|-------------------------------------------------------|--------|--------|--------|--------------|
| History of arthritis                                  | <0.001 | 0.07   | 1.65   | 1.00, 2.29   |
| History of previous bone fractures                    | 0.18   | 0.02   | 0.42   | -0.19, 1.03  |
| History of low back pain                              | 0.001  | 0.04   | 0.97   | 0.41, 1.53   |
| History of thoracic spine pain                        | <0.001 | 0.07   | 1.72   | 1.06, 2.38   |
| History of neck pain                                  | <0.001 | 0.05   | 1.18   | 0.56, 1.80   |
| History of headache                                   | <0.001 | 0.07   | 1.54   | 0.98, 2.10   |
| History of cancer                                     | 0.006  | 0.04   | 2.38   | 0.67, 4.08   |
| History of cardiovascular disorders including stroke  | <0.001 | 0.05   | 1.27   | 0.62, 1.92   |
| History of dementia                                   | 0.004  | 0.04   | 5.05   | 1.63, 8.48   |
| History of diabetes mellitus                          | 0.52   | -0.009 | -0.34  | -1.38, 0.69  |
| History of diarrhea                                   | 0.86   | 0.002  | 0.37   | -3.62, 4.36  |
| History of iron-deficiency anemia                     | 0.34   | 0.01   | 0.59   | -0.63, 1.81  |
| History of low blood pressure and hospital admittance | 0.97   | -0.001 | -0.03  | -1.67, 1.54  |
| History of osteoarthritis                             | <0.001 | 0.07   | 1.89   | 1.16, 2.62   |
| History of skin disease                               | 0.07   | 0.02   | 1.16   | -0.09, 2.41  |
| History of thyreopathy                                | 0.92   | -0.001 | -0.05  | -1.00, 0.90  |
| History of tumbling                                   | 0.11   | 0.02   | 0.58   | --0.13, 1.29 |
| History of unconsciousness                            | 0.02   | 0.03   | 1.19   | 0.17, 2.22   |
| Age of the last menstrual bleeding (years)            | 0.66   | -0.009 | -0.02  | -0.11, 0.07  |
| Age of last regular menstrual bleeding (years)        | 0.92   | -0.002 | -0.005 | -0.09, 0.09  |
| History of menopause                                  | 0.55   | -0.01  | -0.35  | -1.51, 0.80  |
| Blood concentrations (mmol/L) of:                     |        |        |        |              |
| Alanine aminotransferase (IU/L)                       | 0.41   | 0.01   | 0.01   | -0.01, 0.03  |
| Aspartate aminotransferase (IU/L)                     | 0.50   | 0.009  | 0.009  | -0.02, 0.03  |
| Bilirubin, total (µmol/L)                             | 0.65   | 0.006  | 0.006  | -0.02, 0.03  |
| High-density lipoproteins (mmol/L)                    | 0.78   | -0.004 | -0.05  | -0.36, 0.27  |
| Low-density lipoproteins (mmol/L)                     | 0.62   | 0.007  | 0.06   | -0.18, 0.30  |
| Cholesterol (mmol/L)                                  | 0.79   | -0.03  | -0.02  | -0.19, 0.14  |
| Triglycerides (mmol/L)                                | 0.28   | -0.01  | -0.21  | -0.59, 0.17  |
| Rheumatoid factor (IU/mL)                             | 0.14   | -0.02  | -0.25  | -0.58, 0.09  |
| Erythrocyte sedimentation rate (mm / hour)            | 0.95   | -0.001 | -0.001 | -0.03, 0.03  |
| Glucose (mmol/L)                                      | 0.48   | -0.009 | -0.06  | -0.23, 0.11  |
| Prevalence of diabetes mellitus                       | 0.12   | -0.02  | -0.71  | -1.62, 0.20  |
| Creatinine (µmol/L)                                   | 0.45   | 0.01   | 0.004  | -0.007, 0.02 |
| Urea (mmol/L)                                         | 0.22   | -0.02  | -0.12  | -0.32, 0.07  |

|                                                                 |        |        |       |              |
|-----------------------------------------------------------------|--------|--------|-------|--------------|
| Residual nitrogen (g/L)                                         | 0.74   | -0.004 | -0.66 | -4.53, 3.21  |
| Total protein (g/L)                                             | 0.75   | 0.004  | 0.007 | -0.04, 0.05  |
| International normalized ratio (INR)                            | 0.13   | -0.02  | -1.50 | -3.41, 0.42  |
| Prothrombin time (%)                                            | 0.98   | 0.000  | 0.007 | -0.53, 0.54  |
| Hemoglobin                                                      | 0.45   | -0.01  | 0.007 | -0.03, 0.01  |
| Erythrocytes (10 <sup>6</sup> cells / $\mu$ L)                  | 0.93   | 0.001  | 0.04  | -0.71, 0.78  |
| Leukocytes (10 <sup>9</sup> cells / L)                          | 0.55   | -0.008 | -0.06 | -0.26, 0.14  |
| Rod-core granulocyte (% of leukocytes)                          | 0.77   | 0.004  | 0.03  | -0.18, 0.24  |
| Segment nuclear granulocyte (% of leukocytes)                   | 0.45   | -0.01  | -0.02 | -0.05, 0.02  |
| Eosinophil granulocytes (% of leukocytes)                       | 0.42   | -0.01  | -0.12 | -0.40, 0.17  |
| Lymphocytes (% of leukocytes)                                   | 0.11   | 0.02   | 0.04  | -0.008, 0.08 |
| Monocytes (% of leukocytes)                                     | 0.49   | -0.009 | -0.04 | -0.17, 0.08  |
| Blood pressure, systolic (mmHg)                                 | 0.74   | 0.005  | 0.002 | -0.01, 0.02  |
| Blood pressure, diastolic (mmHg)                                | 0.77   | 0.004  | 0.004 | -0.02, 0.03  |
| Blood pressure, mean (mmHg)                                     | 0.45   | .0.01  | -0.01 | -0.05, 0.02  |
| Prevalence of arterial hypertension                             | 0.03   | 0.03   | 0.64  | 0.05, 1.22   |
| Prevalence of chronic obstructive pulmonary disease             | 0.67   | 0.006  | 0.24  | -0.87, 1.35  |
| Diet                                                            |        |        |       |              |
| Vegetarian diet / mixed diet                                    | 0.57   | 0.007  | 2.43  | -6.01, 10.9  |
| Number of meals per day                                         | 0.22   | 0.02   | 0.23  | -0.13, 0.58  |
| In a week how many days do you eat fruits?                      | 0.001  | -0.05  | -0.25 | -0.40, -0.11 |
| In a week how many days do you eat vegetables?                  | <0.001 | 0.05   | 0.005 | 0.002, 0.008 |
| Type of oil used for cooking: vegetable oil / non-vegetable oil | 0.058  | -0.03  | -0.20 | -0.40, 0.006 |
| Salt consumed per day (g)                                       | 0.10   | 0.02   | 0.002 | 0.000, 0.005 |
| Degree of processing of meat (weak / medium / well done)        | 0.24   | -0.02  | -0.64 | -1.71, 0.43  |
| Smoking                                                         |        |        |       |              |
| Do you currently smoke any tobacco products? (yes)              | 0.17   | 0.02   | 0.59  | -0.26, 1.44  |
| Do you smoke daily? (yes / no)                                  | 0.39   | 0.01   | 0.38  | -0.48, 1.24  |
| Package years (package = 20 cigarettes)                         | 0.25   | 0.02   | 0.01  | -0.009, 0.04 |
| Alcohol Consumption                                             |        |        |       |              |

|                                                                                                           |        |      |       |               |
|-----------------------------------------------------------------------------------------------------------|--------|------|-------|---------------|
| Alcohol consumed such as beer, whisky, rum, gin brandy or other local products? (yes / no)                | 0.05   | 0.03 | 0.67  | -0.008, 1.35  |
| How many alcoholic drinks do you have on a typical day when you are drinking)                             | 0.16   | 0.04 | 0.003 | -0.001, 0.007 |
| How often do you have 6 or more drinks on one occasion? (never / rarely / sometimes / often / cannot say) | 0.36   | 0.03 | 0.38  | -0.43, 1.19   |
| Depression                                                                                                |        |      |       |               |
| Depression score                                                                                          | <0.001 | 0.08 | 0.25  | 0.17, 0.32    |
| State-Trait Anxiety Inventory (STAI)                                                                      |        |      |       |               |
| Anxiety score                                                                                             | <0.001 | 0.08 | 0.25  | 0.17, 0.33    |
| Dynamometry                                                                                               |        |      |       |               |
| Manual dynamometry, right hand (dekaNewton)                                                               | 0.40   | 0.01 | 0.01  | -0.02, 0.04   |
| Manual dynamometry, left hand (dekaNewton)                                                                | 0.08   | 0.03 | 0.02  | -0.003, 0.05  |

5  
6  
7



## STROBE Statement—checklist of items that should be included in reports of observational studies

|                           | Item No | Recommendation                                                                                                                                                                                                                                                                                                                                                                                                                                                         | Changes Made                                                                                                                                                                                                                           |
|---------------------------|---------|------------------------------------------------------------------------------------------------------------------------------------------------------------------------------------------------------------------------------------------------------------------------------------------------------------------------------------------------------------------------------------------------------------------------------------------------------------------------|----------------------------------------------------------------------------------------------------------------------------------------------------------------------------------------------------------------------------------------|
| <b>Title and abstract</b> | 1       | (a) Indicate the study's design with a commonly used term in the title or the abstract                                                                                                                                                                                                                                                                                                                                                                                 | The title contains the description of the study design ("population-based")                                                                                                                                                            |
|                           |         | (b) Provide in the abstract an informative and balanced summary of what was done and what was found                                                                                                                                                                                                                                                                                                                                                                    | "As in other countries the prevalence of hearing loss is high in this elderly population in Russia. It is primarily or secondarily associated with older age, depression, male gender, cardiovascular disease and alcohol consumption" |
| <b>Introduction</b>       |         |                                                                                                                                                                                                                                                                                                                                                                                                                                                                        |                                                                                                                                                                                                                                        |
| Background/rationale      | 2       | Explain the scientific background and rationale for the investigation being reported                                                                                                                                                                                                                                                                                                                                                                                   | Page 4, para 1, 2                                                                                                                                                                                                                      |
| Objectives                | 3       | State specific objectives, including any prespecified hypotheses                                                                                                                                                                                                                                                                                                                                                                                                       | Page 4, para 1, 2                                                                                                                                                                                                                      |
| <b>Methods</b>            |         |                                                                                                                                                                                                                                                                                                                                                                                                                                                                        |                                                                                                                                                                                                                                        |
| Study design              | 4       | Present key elements of study design early in the paper                                                                                                                                                                                                                                                                                                                                                                                                                | Page 4, para 3                                                                                                                                                                                                                         |
| Setting                   | 5       | Describe the setting, locations, and relevant dates, including periods of recruitment, exposure, follow-up, and data collection                                                                                                                                                                                                                                                                                                                                        | Page 4, para 3                                                                                                                                                                                                                         |
| Participants              | 6       | (a) <i>Cohort study</i> —Give the eligibility criteria, and the sources and methods of selection of participants. Describe methods of follow-up<br><i>Case-control study</i> —Give the eligibility criteria, and the sources and methods of case ascertainment and control selection. Give the rationale for the choice of cases and controls<br><i>Cross-sectional study</i> —Give the eligibility criteria, and the sources and methods of selection of participants | Page 4, para 3                                                                                                                                                                                                                         |
|                           |         | (b) <i>Cohort study</i> —For matched studies, give matching criteria and number of exposed and unexposed<br><i>Case-control study</i> —For matched studies, give matching criteria and the number of controls per case                                                                                                                                                                                                                                                 | --                                                                                                                                                                                                                                     |
| Variables                 | 7       | Clearly define all outcomes, exposures, predictors, potential confounders, and effect modifiers. Give diagnostic criteria, if applicable                                                                                                                                                                                                                                                                                                                               | Page 4, para 4, page 5, page 6, para 1                                                                                                                                                                                                 |
| Data sources/measurement  | 8*      | For each variable of interest, give sources of data and details of methods of assessment (measurement). Describe comparability of assessment methods if there is more than one group                                                                                                                                                                                                                                                                                   | Page 4, para 4, page 5, page 6, para 1                                                                                                                                                                                                 |
| Bias                      | 9       | Describe any efforts to address potential sources of bias                                                                                                                                                                                                                                                                                                                                                                                                              | Page 4, para 4, page 5, page 6, para 1                                                                                                                                                                                                 |
| Study size                | 10      | Explain how the study size was arrived at                                                                                                                                                                                                                                                                                                                                                                                                                              | Page 4, para 3                                                                                                                                                                                                                         |
| Quantitative variables    | 11      | Explain how quantitative variables were handled in the analyses. If applicable, describe which groupings were chosen and why                                                                                                                                                                                                                                                                                                                                           | Page 6, para 1                                                                                                                                                                                                                         |
| Statistical methods       | 12      | (a) Describe all statistical methods, including                                                                                                                                                                                                                                                                                                                                                                                                                        | Page 6, para 1                                                                                                                                                                                                                         |

|    |  |                                                       |                |
|----|--|-------------------------------------------------------|----------------|
| 1  |  | those used to control for confounding                 |                |
| 2  |  | (b) Describe any methods used to examine              | Page 6, para 1 |
| 3  |  | subgroups and interactions                            |                |
| 4  |  | (c) Explain how missing data were addressed           | Page 6, para 1 |
| 5  |  | (d) <i>Cohort study</i> —If applicable, explain how   | Page 6, para 1 |
| 6  |  | loss to follow-up was addressed                       |                |
| 7  |  | <i>Case-control study</i> —If applicable, explain how |                |
| 8  |  | matching of cases and controls was                    |                |
| 9  |  | addressed                                             |                |
| 10 |  | <i>Cross-sectional study</i> —If applicable, describe |                |
| 11 |  | analytical methods taking account of sampling         |                |
| 12 |  | strategy                                              |                |
| 13 |  | (e) Describe any sensitivity analyses                 |                |

Continued on next page

For peer review only

| <b>Results</b>           |     |                                                                                                                                                                                                              |                                   |
|--------------------------|-----|--------------------------------------------------------------------------------------------------------------------------------------------------------------------------------------------------------------|-----------------------------------|
| Participants             | 13* | (a) Report numbers of individuals at each stage of study—eg numbers potentially eligible, examined for eligibility, confirmed eligible, included in the study, completing follow-up, and analysed            | Page 6, para 2                    |
|                          |     | (b) Give reasons for non-participation at each stage                                                                                                                                                         | Page 6, para 2                    |
|                          |     | (c) Consider use of a flow diagram                                                                                                                                                                           |                                   |
| Descriptive data         | 14* | (a) Give characteristics of study participants (eg demographic, clinical, social) and information on exposures and potential confounders                                                                     | Page 6, para 2                    |
|                          |     | (b) Indicate number of participants with missing data for each variable of interest                                                                                                                          | Page 6, para 2, 3                 |
|                          |     | (c) <i>Cohort study</i> —Summarise follow-up time (eg, average and total amount)                                                                                                                             | --                                |
| Outcome data             | 15* | <i>Cohort study</i> —Report numbers of outcome events or summary measures over time                                                                                                                          |                                   |
|                          |     | <i>Case-control study</i> —Report numbers in each exposure category, or summary measures of exposure                                                                                                         |                                   |
|                          |     | <i>Cross-sectional study</i> —Report numbers of outcome events or summary measures                                                                                                                           | Page 7, para 2, 3, 4              |
| Main results             | 16  | (a) Give unadjusted estimates and, if applicable, confounder-adjusted estimates and their precision (eg, 95% confidence interval). Make clear which confounders were adjusted for and why they were included | Page 7, para 2, 3, 4              |
|                          |     | (b) Report category boundaries when continuous variables were categorized                                                                                                                                    |                                   |
|                          |     | (c) If relevant, consider translating estimates of relative risk into absolute risk for a meaningful time period                                                                                             |                                   |
| Other analyses           | 17  | Report other analyses done—eg analyses of subgroups and interactions, and sensitivity analyses                                                                                                               |                                   |
| <b>Discussion</b>        |     |                                                                                                                                                                                                              |                                   |
| Key results              | 18  | Summarise key results with reference to study objectives                                                                                                                                                     | Page 8, para 1                    |
| Limitations              | 19  | Discuss limitations of the study, taking into account sources of potential bias or imprecision. Discuss both direction and magnitude of any potential bias                                                   | Page 9, para 4                    |
| Interpretation           | 20  | Give a cautious overall interpretation of results considering objectives, limitations, multiplicity of analyses, results from similar studies, and other relevant evidence                                   | Page 8, para 2                    |
| Generalisability         | 21  | Discuss the generalisability (external validity) of the study results                                                                                                                                        | Page 8, para 2-4; page 9 para 1-3 |
| <b>Other information</b> |     |                                                                                                                                                                                                              |                                   |
| Funding                  | 22  | Give the source of funding and the role of the funders for the present study and, if applicable, for the original study on which the present article is based                                                | Page 1                            |

\*Give information separately for cases and controls in case-control studies and, if applicable, for exposed and unexposed groups in cohort and cross-sectional studies.

**Note:** An Explanation and Elaboration article discusses each checklist item and gives methodological background and published examples of transparent reporting. The STROBE checklist is best used in conjunction with this article (freely available on the Web sites of PLoS Medicine at <http://www.plosmedicine.org/>, Annals of Internal Medicine at <http://www.annals.org/>, and Epidemiology at <http://www.epidem.com/>). Information on the STROBE Initiative is available at [www.strobe-statement.org](http://www.strobe-statement.org).
