# Supplementary material for: Self-reported hearing loss in Russians: the population-based Ural Eye and Medical Study
Source: PubMed Central journal article supplement — BMJ Open. 2019 Mar 20;9(3):e024644. doi: 10.1136/bmjopen-2018-024644 (PMC6475155; doi:10.1136/bmjopen-2018-024644), 2019-03-20
Supplement: bmjopen-2018-024644supp001.pdf [file bmjopen-2018-024644supp001.pdf]

- 1 Supplementary Table 1
- 2 Associations between the hearing loss score and other systemic parameters after adjusting for age in
- 3 the Ural Eye and Medical Study
- 4

| Parameter                                                                                        | <i>P</i> -Value | Standardized Regression Coefficient beta | Non-Standardized Regression Coefficient B | 95% Confidence Interval of B |
|--------------------------------------------------------------------------------------------------|-----------------|------------------------------------------|-------------------------------------------|------------------------------|
| Gender: Women / Men                                                                              | <0.001          | 0.05                                     | 1.03                                      | 0.47, 1.60                   |
| Urban / rural region of habitation                                                               | 0.002           | 0.04                                     | 0.93                                      | 0.34, 1.52                   |
| Family status: Married versus any other status                                                   | 0.64            |                                          |                                           |                              |
| Family type: Joint (three generations) / nuclear (two generations) / single / family of 2 people | 0.02            | 0.03                                     | 0.29                                      | 0.04, 0.53                   |
| Ethnicity: Russian / any other ethnicity                                                         | 0.88            | 0.002                                    | 0.05                                      | -0.63, 0.74                  |
| Body height (cm)                                                                                 | 0.82            | 0.003                                    | 0.004                                     | -0.03, 0.04                  |
| Body weight (kg)                                                                                 | 0.03            | -0.03                                    | -0.02                                     | -0.04, -0.002                |
| Body mass index (kg/m <sup>2</sup> )                                                             | 0.01            | -0.03                                    | -0.07                                     | -0.13, -0.02                 |
| Waist circumference (cm)                                                                         | 0.02            | -0.03                                    | -0.03                                     | -0.05, -0.004                |
| Hip circumference (cm)                                                                           | 0.01            | -0.03                                    | -0.03                                     | -0.05, -0.006                |
| Waist-Hip-Ratio                                                                                  | 0.61            | -0.007                                   | -0.81                                     | -3.91, 2.29                  |
| Socioeconomic parameters                                                                         |                 |                                          |                                           |                              |
| Level of education                                                                               | 0.49            | 0.009                                    | 0.06                                      | -0.11, 0.23                  |
| Monthly Income (Below poverty line / average / above average / high)                             | 0.99            | 0.000                                    | -0.01                                     | -0.58, 0.58                  |
| Own ownership of house (yes / no)                                                                | 0.90            | -0.002                                   | -0.09                                     | -1.51, 1.33                  |
| Own ownership of refrigerator (yes / no)                                                         | 0.19            | -0.03                                    | -2.98                                     | -7.40, 1.44                  |
| Own ownership of second house (yes / no)                                                         | 0.03            | -0.04                                    | -1.15                                     | -2.18, -0.12                 |
| Own ownership of telephone (yes / no)                                                            | 0.13            | -0.02                                    | -0.64                                     | -1.48, 0.19                  |
| Own ownership of smartphone (yes / no)                                                           | 0.87            | -0.003                                   | -0.07                                     | -0.91, 0.77                  |
| Own ownership of television set (yes / no)                                                       | 0.13            | -0.02                                    | -0.64                                     | -1.48, 0.19                  |
| Own ownership of car (yes / no)                                                                  | 0.07            | -0.03                                    | -0.82                                     | -1.72, 0.07                  |
| Own ownership of two-wheeler (yes / no)                                                          | 0.87            | -0.002                                   | -0.05                                     | -0.65, 0.56                  |
| Own ownership of tractor (yes / no)                                                              | 0.73            | 0.007                                    | 0.34                                      | -1.55, 2.23                  |

|                                                                                                                                                                                       |        |       |        |               |
|---------------------------------------------------------------------------------------------------------------------------------------------------------------------------------------|--------|-------|--------|---------------|
| Own ownership of bullock cart (yes / no)                                                                                                                                              | 0.76   | 0.006 | 0.32   | -1.71, 2.24   |
| Own ownership of computer / laptop (yes / no)                                                                                                                                         | 0.13   | -0.03 | -0.71  | -1.62, 0.21   |
| Physical activity                                                                                                                                                                     |        |       |        |               |
| How long is your usual work day? (Minutes)                                                                                                                                            | 0.17   | -0.02 | -0.001 | -0.002, 0.000 |
| Does your work involve mostly sitting or standing with less than 10 minutes of walking at a time? (Yes / No)                                                                          | 0.76   | 0.004 | 0.11   | -0.57, 0.78   |
| Does your work involve physically vigorous activity (like heavy lifting or digging) or physically moderate intensity activity (like brisk walking or carrying light loads) (Yes / No) | <0.001 | 0.07  | 1.59   | 0.97, 2.20    |
| How many days a week do you do such physically vigorous activity during work? (Yes / No)                                                                                              | 0.001  | 0.06  | 0.47   | 0.21, 0.73    |
| On a usual day how much time do you spend on such physically vigorous work during work? (Minutes)                                                                                     | <0.001 | 0.06  | 0.002  | 0.001, 0.004  |
| Does your work involve physically moderate-intensive activity, like brisk walking or carrying light loads for at least 10 minutes at a time?                                          | <0.001 | 0.06  | 1.32   | 0.66, 1.98    |
| Do you walk or use a bicycle (pedal cycle) for at least 10 minutes continuously to get to and from places?                                                                            | 0.63   | 0.006 | 0.25   | -0.77, 1.26   |
| In your leisure time, do you do any moderate intensity activities like brisk walking, cycling or swimming for at least 10 minutes at a time?                                          | <0.001 | 0.09  | 2.09   | 1.47, 2.72    |
| Over the past 7 days, how much time did you spend sitting or reclining on a typical day?                                                                                              | 0.40   | 0.01  | 0.000  | 0.000, 0.000  |
| History of diseases                                                                                                                                                                   |        |       |        |               |
| History of angina pectoris                                                                                                                                                            | 0.96   | 0.001 | 0.03   | -0.97, 1-.02  |
| History of asthma                                                                                                                                                                     | 0.03   | 0.03  | 1.95   | 0.20, 3.71    |
| History of arterial hypertension                                                                                                                                                      | 0.01   | 0.03  | 0.76   | 0.17, 1.36    |

|                                                       |        |        |        |              |
|-------------------------------------------------------|--------|--------|--------|--------------|
| History of arthritis                                  | <0.001 | 0.07   | 1.65   | 1.00, 2.29   |
| History of previous bone fractures                    | 0.18   | 0.02   | 0.42   | -0.19, 1.03  |
| History of low back pain                              | 0.001  | 0.04   | 0.97   | 0.41, 1.53   |
| History of thoracic spine pain                        | <0.001 | 0.07   | 1.72   | 1.06, 2.38   |
| History of neck pain                                  | <0.001 | 0.05   | 1.18   | 0.56, 1.80   |
| History of headache                                   | <0.001 | 0.07   | 1.54   | 0.98, 2.10   |
| History of cancer                                     | 0.006  | 0.04   | 2.38   | 0.67, 4.08   |
| History of cardiovascular disorders including stroke  | <0.001 | 0.05   | 1.27   | 0.62, 1.92   |
| History of dementia                                   | 0.004  | 0.04   | 5.05   | 1.63, 8.48   |
| History of diabetes mellitus                          | 0.52   | -0.009 | -0.34  | -1.38, 0.69  |
| History of diarrhea                                   | 0.86   | 0.002  | 0.37   | -3.62, 4.36  |
| History of iron-deficiency anemia                     | 0.34   | 0.01   | 0.59   | -0.63, 1.81  |
| History of low blood pressure and hospital admittance | 0.97   | -0.001 | -0.03  | -1.67, 1.54  |
| History of osteoarthritis                             | <0.001 | 0.07   | 1.89   | 1.16, 2.62   |
| History of skin disease                               | 0.07   | 0.02   | 1.16   | -0.09, 2.41  |
| History of thyreopathy                                | 0.92   | -0.001 | -0.05  | -1.00, 0.90  |
| History of tumbling                                   | 0.11   | 0.02   | 0.58   | --0.13, 1.29 |
| History of unconsciousness                            | 0.02   | 0.03   | 1.19   | 0.17, 2.22   |
| Age of the last menstrual bleeding (years)            | 0.66   | -0.009 | -0.02  | -0.11, 0.07  |
| Age of last regular menstrual bleeding (years)        | 0.92   | -0.002 | -0.005 | -0.09, 0.09  |
| History of menopause                                  | 0.55   | -0.01  | -0.35  | -1.51, 0.80  |
| Blood concentrations (mmol/L) of:                     |        |        |        |              |
| Alanine aminotransferase (IU/L)                       | 0.41   | 0.01   | 0.01   | -0.01, 0.03  |
| Aspartate aminotransferase (IU/L)                     | 0.50   | 0.009  | 0.009  | -0.02, 0.03  |
| Bilirubin, total ( $\mu$ mol/L)                       | 0.65   | 0.006  | 0.006  | -0.02, 0.03  |
| High-density lipoproteins (mmol/L)                    | 0.78   | -0.004 | -0.05  | -0.36, 0.27  |
| Low-density lipoproteins (mmol/L)                     | 0.62   | 0.007  | 0.06   | -0.18, 0.30  |
| Cholesterol (mmol/L)                                  | 0.79   | -0.03  | -0.02  | -0.19, 0.14  |
| Triglycerides (mmol/L)                                | 0.28   | -0.01  | -0.21  | -0.59, 0.17  |
| Rheumatoid factor (IU/mL)                             | 0.14   | -0.02  | -0.25  | -0.58, 0.09  |
| Erythrocyte sedimentation rate (mm / hour)            | 0.95   | -0.001 | -0.001 | -0.03, 0.03  |
| Glucose (mmol/L)                                      | 0.48   | -0.009 | -0.06  | -0.23, 0.11  |
| Prevalence of diabetes mellitus                       | 0.12   | -0.02  | -0.71  | -1.62, 0.20  |
| Creatinine ( $\mu$ mol/L)                             | 0.45   | 0.01   | 0.004  | -0.007, 0.02 |
| Urea (mmol/L)                                         | 0.22   | -0.02  | -0.12  | -0.32, 0.07  |

|                                                                 |        |        |       |              |
|-----------------------------------------------------------------|--------|--------|-------|--------------|
| Residual nitrogen (g/L)                                         | 0.74   | -0.004 | -0.66 | -4.53, 3.21  |
| Total protein (g/L)                                             | 0.75   | 0.004  | 0.007 | -0.04, 0.05  |
| International normalized ratio (INR)                            | 0.13   | -0.02  | -1.50 | -3.41, 0.42  |
| Prothrombin time (%)                                            | 0.98   | 0.000  | 0.007 | -0.53, 0.54  |
| Hemoglobin                                                      | 0.45   | -0.01  | 0.007 | -0.03, 0.01  |
| Erythrocytes ( $10^6$ cells / $\mu$ L)                          | 0.93   | 0.001  | 0.04  | -0.71, 0.78  |
| Leukocytes ( $10^9$ cells / L)                                  | 0.55   | -0.008 | -0.06 | -0.26, 0.14  |
| Rod-core granulocyte (% of leukocytes)                          | 0.77   | 0.004  | 0.03  | -0.18, 0.24  |
| Segment nuclear granulocyte (% of leukocytes)                   | 0.45   | -0.01  | -0.02 | -0.05, 0.02  |
| Eosinophil granulocytes (% of leukocytes)                       | 0.42   | -0.01  | -0.12 | -0.40, 0.17  |
| Lymphocytes (% of leukocytes)                                   | 0.11   | 0.02   | 0.04  | -0.008, 0.08 |
| Monocytes (% of leukocytes)                                     | 0.49   | -0.009 | -0.04 | -0.17, 0.08  |
| Blood pressure, systolic (mmHg)                                 | 0.74   | 0.005  | 0.002 | -0.01, 0.02  |
| Blood pressure, diastolic (mmHg)                                | 0.77   | 0.004  | 0.004 | -0.02, 0.03  |
| Blood pressure, mean (mmHg)                                     | 0.45   | .0.01  | -0.01 | -0.05, 0.02  |
| Prevalence of arterial hypertension                             | 0.03   | 0.03   | 0.64  | 0.05, 1.22   |
| Prevalence of chronic obstructive pulmonary disease             | 0.67   | 0.006  | 0.24  | -0.87, 1.35  |
| Diet                                                            |        |        |       |              |
| Vegetarian diet / mixed diet                                    | 0.57   | 0.007  | 2.43  | -6.01, 10.9  |
| Number of meals per day                                         | 0.22   | 0.02   | 0.23  | -0.13, 0.58  |
| In a week how many days do you eat fruits?                      | 0.001  | -0.05  | -0.25 | -0.40, -0.11 |
| In a week how many days do you eat vegetables?                  | <0.001 | 0.05   | 0.005 | 0.002, 0.008 |
| Type of oil used for cooking: vegetable oil / non-vegetable oil | 0.058  | -0.03  | -0.20 | -0.40, 0.006 |
| Salt consumed per day (g)                                       | 0.10   | 0.02   | 0.002 | 0.000, 0.005 |
| Degree of processing of meat (weak / medium / well done)        | 0.24   | -0.02  | -0.64 | -1.71, 0.43  |
| Smoking                                                         |        |        |       |              |
| Do you currently smoke any tobacco products? (yes)              | 0.17   | 0.02   | 0.59  | -0.26, 1.44  |
| Do you smoke daily? (yes / no)                                  | 0.39   | 0.01   | 0.38  | -0.48, 1.24  |
| Package years (package = 20 cigarettes)                         | 0.25   | 0.02   | 0.01  | -0.009, 0.04 |
| Alcohol Consumption                                             |        |        |       |              |

|                                                                                                           |        |      |       |               |
|-----------------------------------------------------------------------------------------------------------|--------|------|-------|---------------|
| Alcohol consumed such as beer, whisky, rum, gin brandy or other local products? (yes / no)                | 0.05   | 0.03 | 0.67  | -0.008, 1.35  |
| How many alcoholic drinks do you have on a typical day when you are drinking)                             | 0.16   | 0.04 | 0.003 | -0.001, 0.007 |
| How often do you have 6 or more drinks on one occasion? (never / rarely / sometimes / often / cannot say) | 0.36   | 0.03 | 0.38  | -0.43, 1.19   |
| Depression                                                                                                |        |      |       |               |
| Depression score                                                                                          | <0.001 | 0.08 | 0.25  | 0.17, 0.32    |
| State-Trait Anxiety Inventory (STAI)                                                                      |        |      |       |               |
| Anxiety score                                                                                             | <0.001 | 0.08 | 0.25  | 0.17, 0.33    |
| Dynamometry                                                                                               |        |      |       |               |
| Manual dynamometry, right hand (dekaNewton)                                                               | 0.40   | 0.01 | 0.01  | -0.02, 0.04   |
| Manual dynamometry, left hand (dekaNewton)                                                                | 0.08   | 0.03 | 0.02  | -0.003, 0.05  |

5  
6  
7
